1 Infant- and child-level predictors of mortality in low-resource settings: the WHO Child  
2 Mortality Risk Stratification Multi-Country Pooled Cohort

3

4 **The WHO Risk Stratification Working Group (WHO-RSWG)**

5 WHO-RSWG authors, affiliations and roles are listed at the end of this manuscript.

6

7

8 **Corresponding author:** Catherine Schwinger [c.schwinger@uib.no](mailto:c.schwinger@uib.no)

9

10

11 **Keywords:** mortality, low- and middle income, prioritisation, preterm birth, low birth weight,  
12 breastfeeding, guidelines, anthropometry, community, hospital, wasting.

13

14 **Funding**

15 WHO gratefully acknowledges funding support from USAID to establish the pooled database and  
16 conduct the main analyses.

17

18 **Disclaimer:**

19 The authors alone are responsible for the views expressed in this paper and they do not necessarily  
20 represent the views, decisions, or policies of the institutions with which they are affiliated.

21 **SUMMARY (235 words)**

22 **Background**

23 Despite impressive reductions in overall global child mortality, rates of decline have slowed during  
24 the last decade. Current guidelines for the care of at-risk children in low-resource settings mostly  
25 focus on broad clinical syndromes or undernutrition rather than children's individual contextualized  
26 risk. We aimed to identify readily assessable child-level characteristics that can predict child mortality  
27 risk in a range of community and healthcare settings in high-burden settings.

28

29 **Methods**

30 We analysed pooled data from 33 cohorts including 75,287 children under five years of age living in  
31 low resource settings to estimate the absolute risks of death associated with risk exposures  
32 separately and combined with anthropometry. Children were grouped according to population types  
33 studied: general population (GP), selected on anthropometric criteria (A-S), and selected on the  
34 presence of illness (I-S).

35

36 **Findings**

37 During a total of 69,085 child-years of follow-up in the pooled dataset, 2,805 (3.7%) children died.  
38 Age <24 months, low anthropometry, preterm birth, low birthweight, and absence of breastfeeding  
39 were each associated with increased mortality: risks were additive and declined with increasing age.  
40 However, overall mortality and the association between child-level characteristics and mortality  
41 differed according to the type of study population and child age.

42

43 **Interpretation**

44 Risk assessments combining individual child-level characteristics including anthropometry can enable  
45 programmes to identify children at high and lower risk of mortality and, thereafter, differentiate care  
46 accordingly. Such a strategy may reduce mortality and optimise health system efficiency and  
47 effectiveness.

48

49 **INTRODUCTION**

50 Global rates of under-5 child mortality (U5M) have declined from 93 to 38 deaths per 1,000 live  
51 births between 1990 and 2021.<sup>1</sup> However, since 2010, U5M reductions have slowed; 53 countries will  
52 not meet the 2030 UN Sustainable Development Goals (SDG) U5M target.<sup>2</sup> More than 80% of global  
53 U5M occurs in sub-Saharan Africa and South Asia, with significant sub-national heterogeneity.<sup>3,4</sup>  
54 Mortality also varies markedly by age, with a third of U5M in some settings occurring within the first  
55 three days of life<sup>5</sup> and almost half occurring in the first month.<sup>2</sup>

56

57 Low birth weight (LBW), including from preterm birth (PTB), is associated with half of neonatal  
58 deaths and confers life-long health risks.<sup>2</sup> Additionally, undernutrition in all its forms contributes to  
59 45% of U5M.<sup>6</sup> Chronic disease and disability, maternal illiteracy, poor housing conditions, and limited  
60 access to healthcare are less often assessed, but may all directly or indirectly be associated with child  
61 mortality.<sup>7</sup> Focusing on interventions that target underlying pathways associated with these risks may  
62 offer opportunity to reduce mortality. Importantly, however, while a focus on higher-risk children  
63 may avert some mortality, identifying lower risk children may provide opportunities for de-escalation  
64 of care and to optimize available resources while improving care for those at highest risk. While  
65 prognostic scores have been devised among hospitalised children to identify those at high risk, they  
66 are rarely used in practice in LMICs.<sup>8,9</sup>

67

68 We estimated absolute and relative mortality risks associated with separate and combined  
69 assessable, child-level characteristics among children aged 0-59 months through an individual data  
70 pooled analysis of the WHO Child Mortality Risk Stratification Multi-Country Pooled Cohort (WHO  
71 CMRS).

## 72 **METHODS**

### 73 Study design

74 We pooled data from individual children enrolled in observational or randomized controlled trials in  
75 LMICs (Table S1). The criteria for inclusion of a dataset were 1) documentation of age, weight, vital  
76 status, date of death, and 2) at least two observations per participant under the age of 60 months.  
77 Details of the study selection procedure are reported fully in the cohort profile.<sup>10</sup>

78

### 79 Data management

80 Thirty-three datasets were included and pooled into a single database with consistent variable  
81 names and structures. Data cleaning included checking for missing data, duplicates, and outliers<sup>10</sup>.  
82 Anthropometric measurements were defined as outliers if mid-upper arm circumference (MUAC)  
83 >300mm or <55mm, weight-for-age (WAZ) >10 or <-10, length <35cm, length- or height-for-age  
84 (HAZ) >10 or <-12, weight-for-length or -height (WHZ) >20 or <-10 and values set to missing. As we  
85 used anthropometric measurements as categorical variables in analyses, and an extreme value  
86 would likely be in the severe deficit category (Z-score <-3), we did not apply more strict cleaning  
87 criteria.

88

### 89 Indicator assessment and definition

90 In all analyses, the outcome was defined as death within the respective observation period. If the  
91 vital status of a child was recorded but age at death was missing, we estimated the age at death by  
92 adding half of the median observation period of the study to the age at the last study contact point  
93 for that child.

94

95 Child-level characteristics were chosen as risk exposure variables for analysis based on availability  
96 across datasets. Weight and height measurements were converted to Z-scores using WHO Child  
97 Growth Standards.<sup>11</sup> We defined a moderate anthropometric deficit as Z-score in WAZ, HAZ, or WHZ  
98 <-2 and  $\geq$ -3, and a severe deficit as Z-score <-3. MUAC was included as an absolute measure (mm).  
99 The WHO guidelines recommend the cut-off for moderate and severe deficits for MUAC at 125mm  
100 and 115mm for children aged 6-59 months.<sup>12</sup> For infants <6 months of age, we also applied cut-offs  
101 of 120mm and 110mm for moderate and severe deficits.<sup>12</sup>

102

103 All other child-level characteristics were dichotomized. Breastfeeding was categorized as yes if the  
104 mother reported any breastfeeding in the 30-day period before assessment.<sup>10</sup> LBW was defined as  
105 <2500g, PTB as gestational age <37 weeks. Due to limitations in gestational assessments, we did not

106 include a variable for small for gestational age (SGA). We captured illness by including any reported  
107 episode of diarrhoea within the prior 14 days, and study physician diagnoses of pneumonia or  
108 caretaker reports of WHO symptom classifications in the last 14 days for lower respiratory tract  
109 infections (LRTI). Severe illness was defined as being admitted to hospital or having any WHO  
110 Integrated Management of Childhood Illness (IMCI) danger sign, i.e., not able to drink or breastfeed,  
111 convulsions, lethargic or unconscious<sup>13</sup>. The IMCI danger sign of vomiting everything was not  
112 consistently available for inclusion in the pooled dataset.

113

114 Each study was classified into one of three population types based on the assumption that  
115 associations between risk exposures and mortality would differ between subsets of children: (1)  
116 “General population” (GP) if enrolment to the original study was not based on an anthropometric  
117 deficit or the presence of an illness, (2) Anthropometry-Selected (A-S) if children were enrolled based  
118 on an anthropometric deficit, or (3) Illness-Selected (I-S) if children were enrolled on the basis of  
119 signs or symptoms of an illness (potentially in addition to other eligibility criteria)<sup>10</sup>.

120

#### 121 Statistical analysis

122 All statistical analyses were done using R version 4.3.1 (R Foundation for Statistical Computing,  
123 Vienna, Austria, 2023). To estimate the probability of dying within an observation period, we used  
124 multiple generalized linear mixed effects regression (glmer) models of the binomial distribution  
125 family and logit link function. The dependent variable of these models was whether a child died  
126 during the observation period, and all models included child and study as random intercepts. As the  
127 time intervals between observations affect the possibility of capturing death, we also included the  
128 log transformed time in months between each visit as an offset.

129

130 We built separate models for each exposure; all models included age at time of visit. From these  
131 models, we calculated odds ratios (see supplementary material) and the predicted absolute risk of  
132 death per child-month. We report these according to age groups 0-5, 6-11, 12-23, and 24-59 months.  
133 In addition, we graphically display the predicted absolute mortality risk over the age range of 0-24  
134 months. All models included an interaction term between age at the time of visit and the other  
135 independent variable. To account for differences in the completeness of data, missing observations  
136 from independent variables were included as a distinct category, such that the risk of dying was  
137 separately calculated for children with missing values.

138

139 To estimate the association of not being breastfed, LBW, or PTB, combined with an anthropometric  
140 deficit, we estimated the absolute risk using the same statistical approach noted above. We estimate  
141 the risk for none, only one of the exposures (e.g., underweight but breastfed) and both together  
142 (e.g., underweight AND not breastfed). Only children with information on both exposures were used  
143 in the analyses. Data availability for each study is detailed in the cohort profile.<sup>10</sup>

144

145 All analyses were run separately for the three population categories: GP, A-S, or I-S. In additional  
146 analyses, we report absolute risks of death only for children with death age available (Table S2). We  
147 decided a priori to report only those estimates where there were more than 20 observations within  
148 each age-specific risk exposure group.

149

#### 150 Ethics

151 The funders of the studies had no role in study design, data collection, data analysis, data  
152 interpretation, or writing of the report. All principal investigators contributing data signed an  
153 agreement with WHO for pooling and use of anonymous study data for pre-defined analyses. All  
154 study investigators confirmed that each included study had appropriate ethical review approval and  
155 that informed consent was obtained from all participants. The WHO Ethics Review Committee  
156 granted an exemption in March 2022 (ERC.0003745). The pooled data are kept on a secure server at  
157 the University of Bergen, Norway with restricted access.

158 **RESULTS**

159 Pooled dataset

160 Of 35 datasets received, two did not meet the inclusion criteria (Figure 1), and data from 33 studies  
161 were included and pooled. In total, 4.5% observations were excluded from analyses (i.e., 949  
162 duplicate observations, 22,342 observations without age at a single observation timepoint, 160  
163 observations occurring at age >60 months, and 1,047 observations without information on sex).<sup>10</sup>  
164 The sample sizes of included studies ranged from 247 to 7,956 children. The final pooled dataset  
165 included individual-level data from 75,287 children aged 0-5 years and 546,459 observations. There  
166 were 23 studies classified as GP (49,740 children), six studies classified as A-S (14,759 children), and  
167 four studies classified as I-S (10,788 children) (Figure 1).

168

169 **[Figure 1: Study flow]**

170

171 Baseline characteristics of children differed between the three population types (Table 1). Children in  
172 GP studies were younger at enrolment (median age of one month as compared to 13.6 months (A-S)  
173 and 10.7 months (I-S)). In studies in which birthweight and gestational age were collected, the  
174 proportion of children without information on birthweight was 6% among GP studies (1,659/28,326  
175 children), 14% among A-S studies (174/1,286), and 10% among I-S studies (956/9,515). The  
176 proportion of missing data on PTB was 2% in GP studies (574/28,274 children) and 0.7% in I-S studies  
177 (47/6,414 children). None of the A-S studies had information on PTB. The proportion of missing data  
178 increased with age; among children aged 12-23 months, this information was not available for 24-  
179 39% of the children (Supplementary Table S3). The anthropometric values among children in A-S  
180 studies at time of first measurement were lower than in GP and I-S studies. Symptoms and signs of  
181 illness were more common among children in I-S studies. Median maternal HIV prevalence also  
182 differed significantly by study type (Table 1).

183

184 Follow-up duration and frequency varied between studies: median (IQR) follow-up time per child  
185 was 17 (11,23), 3 (1,6), and 6 (5.9,6.2) months, in the GP, A-S and I-S populations, respectively. The  
186 median (IQR) interval between visits was 1 (0.9,1.3) month in the GP population, 0.5 (0.4,0.9)  
187 months in the A-S population, and 3 (1.6,6) months in the I-S population. Fourteen of the 23 GP  
188 studies were birth cohorts (enrolling up to 17 days after birth) including 25,992 of 49,739 children  
189 (52%); only one of six A-S studies (2,079/14,760 children; 14%) and none of four I-S studies enrolled  
190 from birth. See Table S1 and the cohort description.<sup>10</sup>

191

192 There were 2,805 deaths during a total of 69,085 child-years of follow up. Death occurred in 2.5% of  
193 children in the GP population (1,238/49,740), 2.5% in the A-S population (366/14,759) and 11% in  
194 the I-S population (1,201/10,788). Age at time of death was documented for 2,660 (95%) children.

195

196 **[Table 1]**

197

198 Mortality risks in the GP population

199 Age was a strong predictor of death, with the highest absolute risk of death within the first months  
200 after birth, declining with increasing age (see Figure 2). The risk of death increased with lower  
201 anthropometric status at all ages and for all anthropometric indices (Figure 2). The mortality risks in  
202 the age groups <6, 6-11, 12-23, and 24-59 months can be found in Supplementary Tables S3 and S4.  
203 The highest absolute mortality risks were among those with very low WAZ and youngest age.  
204 However, the age gradient was not apparent for MUAC, where the absolute mortality risk was  
205 relatively stable between birth and 24 months (Figure 2). Applying modified cut-offs for moderate  
206 and severe deficits among children aged 0-5 months (i.e., 120 and 110mm) did not substantially  
207 change the risk estimates (Supplementary Table S3). The mortality risk associated with a deficit in  
208 WAZ by stunting status changed with age (Supplementary Table S5). Among children with low WAZ  
209 aged less than 12 months, concurrent stunting increased the mortality risk; among those with low  
210 WAZ and aged 12 months or more, concurrent stunting was associated with lower mortality risk.

211

212 **[Figure 2: The absolute predicted risk of death in GP children 0-24 months of age according to**  
213 **A) age; B) weight-for-age Z-score (WAZ), C) length/height-for-age Z-score (HAZ), D) weight-for-**  
214 **length/height Z-score (WHZ), E) mid-upper arm circumference in mm (MUAC), F)**  
215 **breastfeeding practices, G) birthweight, and H) age of gestation at birth]**

216

217 Reported symptoms of diarrhea or LRTI did not further discriminate mortality risks (Supplementary  
218 Table S3). Very few children were reported to have any severe illness as defined. Infants who were  
219 reported as not breastfeeding had a higher absolute mortality risk as compared to those who were  
220 receiving any breastfeeding (Figure 2). The mortality risk associated with not breastfeeding was  
221 highest in younger children and decreased gradually with increasing age. In the age group 24-59  
222 months, there were few children still being breastfed with no differences in absolute mortality risk by  
223 breastfeeding status (Supplementary Table S3). The absolute mortality risk was increased among  
224 LBW or PTB infants and remained elevated until about one year of age (Figure 2).

225



226 In analyses that combined risk exposures, the absolute risk of mortality in children with even a  
227 moderate anthropometric deficit (<-2 Z-scores) was further increased when there was a history of  
228 LBW, PTB, or no reported breastfeeding (Table 2 and Figure 3).

229

230 **[Figure 3. The absolute risk of death in GP children 0-24 months of age with combined risk**  
231 **exposures: either not breastfeeding, low birthweight, or being born preterm, combined with**  
232 **low weight-for-age (WAZ), low height-for-age (HAZ), low weight-for-height (WHZ) or low mid-**  
233 **upper arm circumference (MUAC). Analyses are restricted to children where data on both**  
234 **indicators are available (see also Table 2)]**

235

236 **[Table 2]**

237

238 Mortality risks in the anthropometry-selected (A-S) and illness-selected (I-S) populations

239 Although children in the A-S population were older than those in the GP population, mortality was  
240 similar in both groups (2.5% in both). However, in the I-S population, mortality was significantly  
241 higher (11%) and did not decrease as clearly with increasing age (Supplementary Table S6).

242

243 Anthropometric deficits in the A-S and I-S populations tended to be more severe, but these deficits  
244 did not identify mortality risk as clearly as in GP studies. (Tables S6 and S7) There was only one A-S  
245 study with information on birthweight and LBW did not increase the risk of death. In I-S studies,  
246 there was an increased mortality risk in LBW and PTB (although estimates for PTB were imprecise  
247 due to low number of preterm children (Tables S8 and S9).

248

249 Among infants less than six months of age in I-S studies, the mortality risk of those with an IMCI  
250 danger sign was six times higher compared to those without. The absolute mortality risk decreased  
251 with age but remained higher than in children without danger signs in each age group. The risk  
252 increased if there was more than one danger sign present – though confidence intervals were  
253 overlapping. There were too few children in A-S studies with multiple dangers signs to enable  
254 analyses.

255

256 In both the A-S and the I-S child populations, the mortality risk of not being breastfed added to the  
257 risks associated with anthropometric deficits for all measures, although sample sizes were limited  
258 with overlapping confidence intervals (Tables 3 and 4).

259

260 **[Table 3]**

261

262 [Table 4]

263 **DISCUSSION**

264 Among 75,287 children under five years old in 33 pooled cohorts across a range of low resource  
265 settings, four readily assessable child-level characteristics – age less than 24 months, low weight-for-  
266 age, history of low birthweight or preterm birth, and not breastfeeding in the immediate period  
267 preceding – identified children at high risk of mortality. The highest mortality risk (GP studies) was  
268 seen at the youngest ages, with a relatively low risk of death beyond two years of age. Young children  
269 with even a moderate anthropometric deficit and an additional risk exposure (LBW, PTB or not  
270 breastfeeding) were at very high risk.

271

272 Our analyses are consistent with other reports that most child deaths occur in the first days of life<sup>2,5</sup>  
273 and that mortality declines rapidly during the first year. Despite these data, infants under twelve  
274 months of age are not consistently prioritized in health and nutrition programmes<sup>14</sup>, though some  
275 efforts are trying to address this.<sup>15,16</sup> In contrast to WAZ, WHZ identified mortality risk better with  
276 increasing age, but showed poor discrimination among infants as reported elsewhere.<sup>17,18</sup> An  
277 important finding was that concurrent stunting and underweight among infants was associated with  
278 increased mortality; whereas, after 12 months of age, concurrent stunting was associated with a  
279 lower mortality risk. This possibly reflects specific vulnerabilities associated with small size at birth  
280 that are largely lost by one year and points to the need for sustained interventions throughout the  
281 first 12 months of life for LBW infants. The mortality risk associated with low MUAC was relatively  
282 stable between 1-24 months of age reflecting the balance between older children meeting MUAC  
283 criteria being relatively more wasted while their mortality risks tending to decline with increasing  
284 age. In our analyses, using cut-offs of <110mm and <120mm for severe and moderate wasting in  
285 infants <6 months of age (mentioned in WHO 2023 Wasting guidelines) did not substantially change  
286 mortality risks compared to 115mm and 125mm. Nevertheless, it might have implications for  
287 caseload and choice of intervention.<sup>19</sup> Further analyses of the pooled dataset will examine the  
288 performance of anthropometric criteria.

289

290 As noted by others, children born preterm or with LBW had a higher mortality risk<sup>20-23</sup>. In our  
291 analyses, mortality was high throughout the first year of life and remained increased until 24 months  
292 of age. The addition of information about LBW, PTB, or not breastfeeding to anthropometry added  
293 considerably to the identification of infants at high and lower mortality risk. Between birth and 24  
294 months, children in the GP population who were even moderately underweight but had a history of  
295 LBW had increased mortality risk. Notably however, children who were born LBW but who were not  
296 underweight, i.e., who had caught up, were not at increased risk. Infants who were moderately

297 underweight and not breastfed were similarly at increased mortality risk. In these infants, recovering  
298 or maintaining WAZ probably reflects general nurturing care and health, in addition to appropriate  
299 breastfeeding. In A-S and I-S studies, only the combination of any low anthropometric status and not  
300 being breastfed carried an additional risk. These analyses demonstrate how the context and inclusion  
301 criteria of individual studies needs to be considered when interpreting the performance of risk  
302 indicators.

303

304 Reported symptoms of diarrhea and LRTI did not add to the predicted mortality risk in the GP and A-  
305 S populations. These conditions clearly contribute to child mortality, but the value of self-reported  
306 illness is limited. Diarrhea episodes were likely mild and thus did not pose a measurable mortality  
307 risk. Pneumonia is similarly difficult to diagnose, and commonly used syndromic definitions have low  
308 specificity. There were also few deaths in these children leading to imprecision and probably an  
309 underestimation of the risks associated with pneumonia<sup>24</sup>. In I-S studies, the hospitalization period  
310 accounted for approximately 50% deaths occurring during 6-months of observation; about 50% post-  
311 discharge deaths also occurred within one month of discharge, highlighting both the risks of serious  
312 conditions requiring admission and the continued mortality risk in children that persists after  
313 discharge from acute care.<sup>25,26</sup>

314

315 Strengths of the analyses include a large sample size originating from 33 relatively recent studies  
316 conducted in different regions. The analytical techniques were robust and, different from previous  
317 analyses<sup>27,28</sup>, accounted for repeated measures, clustering within studies as well as differences  
318 between measurement intervals. Importantly, we report predicted absolute risks by age groups  
319 within the first five years of age. Several analyses have previously reported relative risk measures,  
320 such as a hazard ratio, and have not generally considered the effects of age<sup>29,30</sup>. While a relative risk  
321 informs about the magnitude of association between an exposure and an outcome, it neglects the  
322 magnitude of the problem, i.e. the absolute risk of dying in different populations and age groups.

323 Limitations of the analyses include that studies in the pooled dataset were not necessarily  
324 representative of countries or specific populations. Eligibility criteria of original studies may also have  
325 skewed the age and exposure distribution which should be considered when interpreting the  
326 findings. A paucity of data in the first week of life limited our ability to examine early life risk  
327 exposures in more detail.

328

329 The analyses demonstrate that assessable, child-level characteristics can be used to identify young  
330 children at high and lower risk of mortality. Individual child-centred risk assessment could improve

331 care and outcomes of high-risk children while improving management and efficiencies for lower-risk  
332 children. To mitigate risks, low birth weight and preterm infants can be identified at birth and  
333 immediately followed-up and supported over a 12-month period to optimise care and nutrition. Low  
334 weight-for-age routinely identified at facility or community health visits should prompt the  
335 identification of other concurrent risks such as LBW, PTB or not breastfeeding. This would identify  
336 children needing closer follow-up and ensure, at minimum, continued monitoring and that  
337 vaccinations are received, and mothers are well and able to breastfeed. Young children being  
338 discharged from hospital could be actively followed-up in communities and facilities through the first  
339 month post-discharge. We need to learn how treatment of specific conditions such as pneumonia or  
340 diarrhoea may differ by risk status.

341

342 Finally, it is important to recognise that treatment or support for a high-risk child may not primarily  
343 target the exposure that identifies the child as being vulnerable. For example, it is not possible to  
344 change the birth weight or gestational age. However, it is possible to implement interventions to  
345 modify their risk such as improved support and follow-up care. A strength of the findings is their  
346 relative simplicity that point to an opportunity and paradigm shift toward more child-centred and  
347 targeted care. Avoiding the temptation to over-complicate risk assessments will be essential for  
348 programmes.

349

350 More effective targeting of interventions to those children at highest risk, while de-escalating care  
351 for those at significantly lower risk, offers enormous opportunity. In settings where resources are  
352 constrained, it is imperative that we optimize the efficiency of programmes while reducing mortality  
353 and morbidity as effectively as possible. These data suggest that simple risk assessment tools that  
354 are predicated on individual child characteristics, in addition to the severity of illnesses, may allow  
355 for differentiation in care and approaches that further improve child survival, health and  
356 development.

357

#### 358 [Authors' contributions](#)

359 Conceptualization: Catherine Schwinger, Nigel Rollins, Rajiv Bahl, Tor Strand; Design: all  
360 WHO-RSWG members; Statistical analysis: Catherine Schwinger, Tor Strand, Ayushi, James A.  
361 Berkley; Data acquisition and interpretation: all WHO-RSWG members; Drafting the  
362 manuscript: Catherine Schwinger, Nigel Rollins, James A. Berkley, Tor Strand, Judd L. Walson;  
363 Reviewing the manuscript: all WHO-RSWG members.

364

365 [Declaration of interest](#)

366 All authors confirm no conflict of interest

367

368 [Role of the funding source](#)

369 Funding sources had no role in study design; in the collection, analysis, and interpretation of data; in  
370 the writing of the report; and in the decision to submit the paper for publication.

371

372 [Acknowledgments](#)

373 We thank all study participants and their families for their valuable time in the studies; the teams of  
374 each individual study for conducting the study; Tejshri Shah for initial coordination of the working  
375 group; and Håkon Gjessing for helpful discussions.

376

377 References

- 378 1. UNICEF. Under-five mortality. 2023. [https://data.unicef.org/topic/child-survival/under-](https://data.unicef.org/topic/child-survival/under-five-mortality)  
379 five-mortality (accessed 28th August 2023).
- 380 2. Sharrow D, Hug L, You D, et al. Global, regional, and national trends in under-5 mortality  
381 between 1990 and 2019 with scenario-based projections until 2030: a systematic  
382 analysis by the UN Inter-agency Group for Child Mortality Estimation. *Lancet Glob*  
383 *Health* 2022; **10**(2): e195-e206.
- 384 3. India State-Level Disease Burden Initiative Child Mortality C. Subnational mapping of  
385 under-5 and neonatal mortality trends in India: the Global Burden of Disease Study  
386 2000-17. *Lancet* 2020; **395**(10237): 1640-58.
- 387 4. Macharia PM, Giorgi E, Thurania PN, et al. Sub national variation and inequalities in  
388 under-five mortality in Kenya since 1965. *BMC Public Health* 2019; **19**(1): 146.
- 389 5. Sankar MJ, Natarajan CK, Das RR, Agarwal R, Chandrasekaran A, Paul VK. When do  
390 newborns die? A systematic review of timing of overall and cause-specific neonatal  
391 deaths in developing countries. *J Perinatol* 2016; **36 Suppl 1**(Suppl 1): S1-S11.
- 392 6. Black RE, Victora CG, Walker SP, et al. Maternal and child undernutrition and overweight  
393 in low-income and middle-income countries. *Lancet* 2013; **382**(9890): 427-51.
- 394 7. Childhood Acute Illness & Nutrition Network. Childhood mortality during and after  
395 acute illness in Africa and south Asia: a prospective cohort study. *Lancet Glob Health*  
396 2022; **10**(5): e673-e84.
- 397 8. Wen B, Brals D, Bourdon C, et al. Predicting the risk of mortality during hospitalization in  
398 sick severely malnourished children using daily evaluation of key clinical warning signs.  
399 *BMC medicine* 2021; **19**(1): 222.
- 400 9. George EC, Walker AS, Kiguli S, et al. Predicting mortality in sick African children: the  
401 FEAST Paediatric Emergency Triage (PET) Score. *BMC Med* 2015; **13**: 174.
- 402 10. Schwinger C, Kaldenbach S, Berkley JA, et al. Cohort profile: The WHO Child Mortality  
403 Risk Stratification Multi-Country Pooled Cohort (WHO-CMRS) to identify predictors of  
404 mortality through early childhood. *medRxiv* 2024: 2024.03.06.24303859.
- 405 11. WHO. WHO Child Growth Standards: Methods and development: Length/height-for-age,  
406 weight-for-age, weight-for-length, weight-for-height and body mass index-for-age.  
407 Geneva: World Health Organization Multicentre Growth Reference Study; 2006.
- 408 12. WHO. WHO guideline on the prevention and management of wasting and nutritional  
409 oedema (acute malnutrition) in infants and children under 5 years. Geneva: World  
410 Health Organization, 2023.
- 411 13. WHO. Integrated Management of Childhood Illness (IMCI): Chart Booklet. Geneva,  
412 Switzerland: WHO, 2014.
- 413 14. Grey K, Rana R, McGrath M, Kerac M. Key considerations for developing patient  
414 management tools for small and nutritionally at-risk infants: A scoping review. *World*  
415 *Nutrition* 2023; **14**(1): 58-75.
- 416 15. Engler R, McGrath M, Kerac M. Training Packages and Patient Management Tools for  
417 Healthcare Staff Working with Small, Nutritionally At-Risk Infants Aged under 6 Months:  
418 A Mixed-Methods Study. *Children (Basel)* 2023; **10**(9).
- 419 16. Grey K, Brennan E, Kerac M, McGrath M. The MAMI Care Pathway Package: A resource  
420 to support the management of small and nutritionally at-risk infants under six months  
421 of age and their mothers (MAMI). *South Sudan Medical Journal* 2021; **14**(3).

- 422 17. Lelijveld N, Kerac M, McGrath M, Mwangome M, Berkley JA. A review of methods to  
423 detect cases of severely malnourished infants less than 6 months for their admission  
424 into therapeutic care: Emergency Nutrition Network, 2017.
- 425 18. Mwangome M, Ngari M, Fegan G, et al. Diagnostic criteria for severe acute malnutrition  
426 among infants aged under 6 mo. *Am J Clin Nutr* 2017; **105**(6): 1415-23.
- 427 19. Khara T, Myatt M, Sadler K, et al. Anthropometric criteria for best-identifying children at  
428 high risk of mortality: a pooled analysis of twelve cohorts. *Public Health Nutr* 2023;  
429 **26**(4): 1-17.
- 430 20. Lawn JE, Ohuma EO, Bradley E, et al. Small babies, big risks: global estimates of  
431 prevalence and mortality for vulnerable newborns to accelerate change and improve  
432 counting. *Lancet* 2023; **401**(10389): 1707-19.
- 433 21. Upadhyay RP, Martines JC, Taneja S, et al. Risk of postneonatal mortality, hospitalisation  
434 and suboptimal breast feeding practices in low birthweight infants from rural Haryana,  
435 India: findings from a secondary data analysis. *BMJ Open* 2018; **8**(6): e020384.
- 436 22. Zoleko-Manego R, Mischlinger J, Dejon-Agobé JC, et al. Birth weight, growth, nutritional  
437 status and mortality of infants from Lambaréné and Fougamou in Gabon in their first  
438 year of life. *PLoS One* 2021; **16**(2): e0246694.
- 439 23. O'Leary M, Edmond K, Floyd S, Newton S, Thomas G, Thomas SL. A cohort study of low  
440 birth weight and health outcomes in the first year of life, Ghana. *Bull World Health  
441 Organ* 2017; **95**(8): 574-83.
- 442 24. Martin H, Falconer J, Addo-Yobo E, et al. Assembling a global database of child  
443 pneumonia studies to inform WHO pneumonia management algorithm: Methodology  
444 and applications. *J Glob Health* 2022; **12**: 04075.
- 445 25. CHAIN Network. Childhood mortality during and after acute illness in Africa and south  
446 Asia: a prospective cohort study. *Lancet Glob Health* 2022; **10**(5): e673-e84.
- 447 26. Wiens MO, Bone JN, Kumbakumba E, et al. Mortality after hospital discharge among  
448 children younger than 5 years admitted with suspected sepsis in Uganda: a prospective,  
449 multisite, observational cohort study. *Lancet Child Adolesc Health* 2023; **7**(8): 555-66.
- 450 27. Thurstans S, Wrottesley SV, Fenn B, et al. Anthropometric deficits and the associated risk  
451 of death by age and sex in children aged 6-59 months: A meta-analysis. *Matern Child  
452 Nutr* 2023; **19**(1): e13431.
- 453 28. Schwinger C, Golden MH, Grellety E, Roberfroid D, Guesdon B. Severe acute  
454 malnutrition and mortality in children in the community: Comparison of indicators in a  
455 multi-country pooled analysis. *PLoS One* 2019; **14**(8): e0219745.
- 456 29. Olofin I, McDonald CM, Ezzati M, et al. Associations of suboptimal growth with all-cause  
457 and cause-specific mortality in children under five years: a pooled analysis of ten  
458 prospective studies. *PLoS One* 2013; **8**(5): e64636.
- 459 30. McDonald CM, Olofin I, Flaxman S, et al. The effect of multiple anthropometric deficits  
460 on child mortality: meta-analysis of individual data in 10 prospective studies from  
461 developing countries. *The American journal of clinical nutrition* 2013; **97**(4): 896-901.  
462



1 **Table 1: Characteristics of children and their mothers in the pooled dataset according to enrolment criteria groups (general populations**  
 2 **(GP), anthropometry-selected (A-S) and illness-selected (I-S) populations)**

| Characteristic<br>(where data available)     | GP <sup>1</sup> |                     | A-S <sup>1</sup> |                     | I-S <sup>1</sup> |                     |
|----------------------------------------------|-----------------|---------------------|------------------|---------------------|------------------|---------------------|
|                                              | N <sup>2</sup>  | % /<br>median (IQR) | N <sup>2</sup>   | % /<br>median (IQR) | N <sup>2</sup>   | % /<br>median (IQR) |
| <b>Maternal characteristics at enrolment</b> |                 |                     |                  |                     |                  |                     |
| Mother alive                                 | 19,702          | 99.8%               | 12,467           | 98.2%               | 10,721           | 99.0%               |
| Mother primary caretaker                     | 15,052          | 98.1%               | 12,866           | 94.6%               | 9,444            | 93.9%               |
| Maternal age, years                          | 42,549          | 24 (20, 29)         | 2,079            | 23 (21, 25)         | 10,78            | 26 (22, 30)         |
| Maternal education                           | 34,622          |                     | 5,941            |                     | 7,472            |                     |
| no education                                 |                 | 35%                 |                  | 37%                 |                  | 17%                 |
| primary education                            |                 | 25%                 |                  | 10%                 |                  | 25%                 |
| secondary or higher education                |                 | 40%                 |                  | 53%                 |                  | 58%                 |
| Mother HIV positive                          | 10,872          | 0.2%                | 4,418            | 14.6%               | 1,517            | 18.5%               |
| <b>Child's characteristics at enrolment</b>  |                 |                     |                  |                     |                  |                     |
|                                              | N <sup>2</sup>  |                     | N <sup>2</sup>   |                     | N <sup>2</sup>   |                     |
| Child's sex, male                            | 49,740          | 50.5%               | 14,759           | 42.8%               | 10,788           | 55.6%               |
| Child age, months                            | 49,740          | 1.0 (0, 7.8)        | 14,759           | 13.6 (8.3, 22.6)    | 10,788           | 10.7 (4.7, 18.7)    |
| Low birthweight, <2500g                      | 26,667          | 13.3%               | 1,112            | 5.0%                | 8,559            | 7.8%                |
| Birthweight, g                               | 26,667          | 3000 (2700, 3400)   | 1,112            | 3000 (2900, 3400)   | 2,145            | 3000 (2500, 3500)   |
| Preterm birth, <37 weeks of gestation        | 27,700          | 15.7%               | N/A              | N/A                 | 6,367            | 4.3%                |
| WAZ                                          | 42,636          | -0.9 (-1.7, -0.1)   | 14,754           | -2.9 (-3.6, -2.3)   | 10,767           | -1.4 (-2.8, -0.4)   |
| HAZ                                          | 41,251          | -1.1 (-1.9, -0.3)   | 14,747           | -2.5 (-3.5, -1.7)   | 10,721           | -1.2 (-2.4, 0.1)    |
| WHZ                                          | 39,853          | -0.3 (-1.2, 0.7)    | 14,168           | -2.2 (-2.8, -1.6)   | 10,665           | -1.3 (-2.6, -0.1)   |

|                                                          |                        |                |                        |                |                        |                |
|----------------------------------------------------------|------------------------|----------------|------------------------|----------------|------------------------|----------------|
| MUAC, mm                                                 | 33,423                 | 120 (104, 135) | 14,717                 | 118 (110, 123) | 10,762                 | 128 (114, 141) |
| <b>Reported illness or feeding practice at any visit</b> | <b>Obs<sup>2</sup></b> |                | <b>Obs<sup>2</sup></b> |                | <b>Obs<sup>2</sup></b> |                |
| Acute diarrhoea <sup>3</sup>                             | 313,381                | 7.6%           | 53,279                 | 30.2%          | 18,672                 | 43.7%          |
| Acute lower respiratory tract infection <sup>4</sup>     | 150,874                | 3.2%           | N/A                    | N/A            | 18,671                 | 40.1%          |
| Severe illness <sup>5</sup>                              | 242,980                | 1.2%           | 36,476                 | 9.6%           | 17,461                 | 28.4%          |
| Any breastfeeding <sup>6</sup>                           |                        |                |                        |                |                        |                |
| at age 0-5 months                                        | 92,024                 | 98.9%          | 7,947                  | 98.8%          | 3,622                  | 91.2%          |
| at age 6-23 months                                       | 202,644                | 87.0%          | 25,314                 | 81.6%          | 12,673                 | 70.6%          |
| at age 24-59 months                                      | 21,306                 | 18.8%          | 7,521                  | 16.0%          | 2,423                  | 17.1%          |

<sup>1</sup> We categorized studies on the basis of their enrolment criteria, where GP = study cohorts where enrolment was not based on anthropometry or the presence of illness, A-S = study cohorts where children were enrolled on the basis of an anthropometric deficit, I-S = study cohorts where children were enrolled on the basis of the presence of illness using study specific definitions.

<sup>2</sup> N = total number of children with data available for this variable, Obs = total number of observations available for this variable

<sup>3</sup> Any diarrheal episode reported by a clinician or caregiver within the last 24 hours, 3, 7 or 14 days.

<sup>4</sup> Pneumonia or acute lower respiratory tract infection reported by a clinician or caregiver within the last 14 days.

<sup>5</sup> Any of the following: being admitted to hospital, not being able to drink or breastfeed, having had convulsions, being lethargic or unconscious.

<sup>6</sup> Any breastfeeding within the past 14 days reported by caregiver at the study visit.

Abbreviations: HAZ = height-for-age Z-score (includes length-for-age Z-scores); IQR = interquartile range; MUAC = mid-upper arm circumference; N = number of children; Obs = number of observations, WAZ = weight-for-age Z-score; WHZ = weight-for-height Z-score (includes weight-for-length Z-scores).

15 **Table 2: Absolute risk of death per 1,000 child months by age group and by combinations of exposures in General Population (GP)**  
 16 **cohorts, i.e., enrolment not on the basis of anthropometric deficit or the presence of illness**

| Indicator       | <6 months |       |                   |            | 6-11 months |       |                   |           | 12-23 months |       |                   |           | 24-59 months |       |                   |           |
|-----------------|-----------|-------|-------------------|------------|-------------|-------|-------------------|-----------|--------------|-------|-------------------|-----------|--------------|-------|-------------------|-----------|
|                 | N         | Death | Risk <sup>1</sup> | 95% CI     | N           | Death | Risk <sup>1</sup> | 95% CI    | N            | Death | Risk <sup>1</sup> | 95% CI    | N            | Death | Risk <sup>1</sup> | 95% CI    |
| BF & WAZ ≥-2    | 78,448    | 72    | 0.4               | 0.2, 0.8   | 70,186      | 99    | 0.4               | 0.2, 0.8  | 50,120       | 37    | 0.4               | 0.2, 0.8  | 1,608        | 1     | 0.4               | 0.2, 0.9  |
| No BF & WAZ ≥-2 | 706       | 3     | 1.4               | 0.5, 4.3   | 2,110       | 10    | 1.0               | 0.4, 2.5  | 12,040       | 9     | 0.7               | 0.3, 1.8  | 8,897        | 1     | 0.5               | 0.2, 1.7  |
| BF & WAZ <-2    | 9,564     | 58    | 2.0               | 0.9, 4.6   | 17,841      | 76    | 1.5               | 0.7, 3.3  | 18,938       | 44    | 1.1               | 0.5, 2.5  | 981          | 4     | 0.8               | 0.3, 2.1  |
| No BF & WAZ <-2 | 192       | 5     | 5.3               | 1.5, 18.4  | 648         | 4     | 3.7               | 1.5, 9.2  | 5,466        | 7     | 2.6               | 1.0, 6.3  | 5,454        | 4     | 1.8               | 0.5, 5.9  |
| NBW & WAZ ≥-2   | 75,955    | 241   | 0.9               | 0.4, 2.0   | 57,350      | 94    | 0.6               | 0.2, 1.3  | 35,137       | 34    | 0.4               | 0.1, 0.8  | 14,458       | 1     | 0.2               | 0.1, 0.6  |
| LBW & WAZ ≥-2   | 4,962     | 31    | 1.6               | 0.7, 4.0   | 4,055       | 10    | 0.8               | 0.3, 2.0  | 2,524        | 3     | 0.4               | 0.1, 1.3  | 1,159        | 0     | 0.2               | 0.0, 0.9  |
| NBW & WAZ <-2   | 5,032     | 30    | 2.3               | 0.9, 5.5   | 8,697       | 50    | 1.6               | 0.7, 3.8  | 7,419        | 15    | 1.1               | 0.5, 2.8  | 4,681        | 1     | 0.8               | 0.3, 2.3  |
| LBW & WAZ <-2   | 5,808     | 140   | 6.6               | 2.8, 15.3  | 3,689       | 19    | 2.5               | 1.0, 6.1  | 2,693        | 10    | 1.0               | 0.4, 2.7  | 1,352        | 0     | 0.4               | 0.1, 1.3  |
| Term & WAZ ≥-2  | 73,293    | 245   | 1.7               | 1.0, 3.1   | 55,343      | 94    | 1.0               | 0.6, 1.9  | 32,746       | 33    | 0.6               | 0.3, 1.1  | 9,632        | 1     | 0.4               | 0.2, 0.7  |
| PTB & WAZ ≥-2   | 9,723     | 31    | 2.4               | 1.2, 4.7   | 8,232       | 19    | 1.7               | 0.9, 3.2  | 4,622        | 7     | 1.2               | 0.5, 2.6  | 784          | 0     | 0.8               | 0.3, 2.3  |
| Term & WAZ <-2  | 5,598     | 75    | 6.2               | 3.3, 11.4  | 7,662       | 54    | 3.6               | 2.0, 6.6  | 5,305        | 20    | 2.1               | 1.1, 4.1  | 1,192        | 1     | 1.2               | 0.6, 2.7  |
| PTB & WAZ <-2   | 2,496     | 97    | 22.3              | 12.2, 40.7 | 1,802       | 18    | 8.9               | 4.7, 17.0 | 1,126        | 9     | 3.6               | 1.6, 8.1  | 163          | 0     | 1.4               | 0.5, 4.1  |
| BF & WAZ ≥-3    | 85,076    | 87    | 0.4               | 0.2, 1.0   | 82,904      | 140   | 0.5               | 0.2, 1.0  | 63,805       | 60    | 0.5               | 0.2, 1.1  | 2,331        | 4     | 0.5               | 0.2, 1.2  |
| No BF & WAZ ≥-3 | 796       | 3     | 1.3               | 0.4, 4.0   | 2,537       | 11    | 1.1               | 0.5, 2.6  | 15,948       | 14    | 0.9               | 0.4, 2.1  | 12,969       | 2     | 0.7               | 0.3, 2.2  |
| BF & WAZ <-3    | 2,936     | 43    | 4.8               | 2.1, 10.8  | 5,123       | 35    | 2.8               | 1.3, 6.0  | 5,253        | 21    | 1.6               | 0.7, 3.8  | 258          | 1     | 0.9               | 0.3, 2.6  |
| No BF & WAZ <-3 | 102       | 5     | 13.2              | 3.7, 45.7  | 221         | 3     | 7.8               | 3.0, 19.9 | 1,558        | 2     | 4.6               | 1.6, 12.9 | 1,382        | 3     | 2.7               | 0.6, 11.7 |
| NBW & WAZ ≥-3   | 79,918    | 254   | 0.9               | 0.4, 2.1   | 64,021      | 122   | 0.6               | 0.3, 1.4  | 41,024       | 41    | 0.4               | 0.2, 1.0  | 18,321       | 2     | 0.3               | 0.1, 0.7  |
| LBW & WAZ ≥-3   | 8,422     | 69    | 2.1               | 0.9, 5.0   | 6,116       | 14    | 0.9               | 0.3, 2.1  | 4,114        | 4     | 0.3               | 0.1, 1.0  | 1,989        | 0     | 0.1               | 0.0, 0.5  |
| NBW & WAZ <-3   | 1,069     | 17    | 5.0               | 2.0, 12.8  | 2,026       | 22    | 3.6               | 1.5, 8.6  | 1,532        | 8     | 2.6               | 0.9, 6.9  | 818          | 0     | 1.8               | 0.5, 6.3  |
| LBW & WAZ <-3   | 2,348     | 102   | 13.5              | 5.8, 31.3  | 1,628       | 15    | 5.1               | 2.1, 12.3 | 1,103        | 8     | 1.9               | 0.7, 5.5  | 522          | 0     | 0.7               | 0.2, 2.7  |
| Term & WAZ ≥-3  | 77,551    | 280   | 1.9               | 1.1, 3.4   | 61,205      | 120   | 1.2               | 0.7, 2.1  | 37,010       | 42    | 0.7               | 0.4, 1.3  | 10,644       | 2     | 0.4               | 0.2, 0.8  |
| PTB & WAZ ≥-3   | 11,066    | 49    | 3.2               | 1.7, 6.0   | 9,423       | 25    | 2.1               | 1.1, 3.8  | 5,441        | 10    | 1.3               | 0.6, 2.8  | 913          | 0     | 0.8               | 0.3, 2.2  |
| Term & WAZ <-3  | 1,340     | 40    | 13.4              | 7.0, 25.3  | 1,800       | 28    | 8.5               | 4.6, 15.7 | 1,041        | 11    | 5.4               | 2.5, 11.3 | 180          | 0     | 3.4               | 1.3, 9.0  |
| PTB & WAZ <-3   | 1,153     | 79    | 40.1              | 22.0, 72.1 | 611         | 12    | 17.9              | 9.1, 34.9 | 307          | 6     | 7.9               | 3.1, 20.2 | 34           | 0     | 3.5               | 0.9, 12.6 |
| BF & HAZ ≥-2    | 73,307    | 71    | 0.4               | 0.2, 1.0   | 68,367      | 113   | 0.4               | 0.2, 0.9  | 41,912       | 38    | 0.4               | 0.2, 1.0  | 1,310        | 2     | 0.4               | 0.2, 1.0  |
| No BF & HAZ ≥-2 | 632       | 3     | 1.6               | 0.5, 4.8   | 1,983       | 10    | 1.3               | 0.6, 3.1  | 8,186        | 11    | 1.1               | 0.5, 2.6  | 6,453        | 1     | 0.9               | 0.3, 2.9  |
| BF & HAZ <-2    | 13,276    | 58    | 1.6               | 0.7, 3.4   | 19,417      | 62    | 0.8               | 0.5, 2.4  | 27,001       | 42    | 0.8               | 0.4, 1.8  | 1,279        | 3     | 0.6               | 0.2, 1.4  |
| No BF & HAZ <-2 | 261       | 5     | 3.3               | 1.0, 11.2  | 776         | 4     | 1.3               | 0.8, 5.1  | 9,123        | 4     | 1.3               | 0.5, 3.2  | 7,783        | 4     | 0.8               | 0.2, 2.7  |
| NBW & HAZ ≥-2   | 71,054    | 221   | 0.9               | 0.4, 2.0   | 55,216      | 103   | 0.6               | 0.3, 1.4  | 29,039       | 32    | 0.4               | 0.2, 1.0  | 10,737       | 0     | 0.3               | 0.1, 0.8  |
| LBW & HAZ ≥-2   | 5,116     | 36    | 1.7               | 0.7, 4.2   | 4,002       | 14    | 1.2               | 0.5, 2.9  | 1,903        | 5     | 0.8               | 0.3, 2.3  | 811          | 0     | 0.9               | 0.1, 2.1  |
| NBW & HAZ <-2   | 8,591     | 45    | 1.9               | 0.8, 4.6   | 10,650      | 41    | 1.2               | 0.5, 2.7  | 13,251       | 17    | 0.7               | 0.3, 1.7  | 8,269        | 2     | 0.4               | 0.2, 1.1  |
| LBW & HAZ <-2   | 5,540     | 133   | 6.7               | 2.9, 15.6  | 3,708       | 15    | 2.0               | 0.8, 4.8  | 3,299        | 8     | 0.6               | 0.2, 1.7  | 1,689        | 0     | 0.2               | 0.0, 0.6  |
| Term & HAZ ≥-2  | 68,724    | 240   | 1.8               | 0.9, 3.4   | 52,045      | 101   | 1.1               | 0.6, 2.1  | 25,958       | 28    | 0.7               | 0.4, 1.4  | 7,046        | 0     | 0.4               | 0.2, 0.9  |
| PTB & HAZ ≥-2   | 8,451     | 29    | 2.5               | 1.2, 5.1   | 7,188       | 18    | 2.3               | 1.1, 4.5  | 3,191        | 9     | 2.0               | 0.9, 4.7  | 467          | 0     | 1.8               | 0.6, 5.4  |
| Term & HAZ <-2  | 9,234     | 75    | 4.4               | 2.3, 8.5   | 10,841      | 47    | 2.3               | 1.2, 4.5  | 11,886       | 24    | 1.2               | 0.6, 2.5  | 3,653        | 2     | 0.7               | 0.3, 1.5  |
| PTB & HAZ <-2   | 3,567     | 97    | 17.4              | 9.0, 33.2  | 2,801       | 19    | 5.3               | 2.7, 10.7 | 2,533        | 7     | 1.6               | 0.7, 3.9  | 457          | 0     | 0.5               | 0.2, 1.5  |
| BF & WHZ ≥-2    | 81,063    | 100   | 0.5               | 0.2, 1.1   | 78,155      | 123   | 0.5               | 0.2, 1.0  | 60,701       | 58    | 0.5               | 0.2, 1.0  | 2,311        | 3     | 0.4               | 0.2, 1.0  |
| No BF & WHZ ≥-2 | 789       | 6     | 2.2               | 0.8, 6.0   | 2,439       | 12    | 1.4               | 0.6, 3.1  | 15,545       | 11    | 0.9               | 0.4, 2.0  | 12,899       | 3     | 0.6               | 0.2, 1.6  |

|                   |        |     |      |           |        |     |     |           |        |    |      |           |        |   |         |           |
|-------------------|--------|-----|------|-----------|--------|-----|-----|-----------|--------|----|------|-----------|--------|---|---------|-----------|
| BF & WHZ <-2      | 5,194  | 25  | 1-6  | 0-7, 3-6  | 9,529  | 52  | 1-5 | 0-7, 3-1  | 8,182  | 22 | 1-4  | 0-6, 3-1  | 277    | 2 | 1-3     | 0-5, 3-5  |
| No BF & WHZ <-2   | 101    | 2   | 3-0  | 0-6, 15-3 | 317    | 2   | 3-3 | 1-1, 9-8  | 1,760  | 4  | 3-7  | 1-4, 10-1 | 1,325  | 2 | 4-2     | 1-0, 18-3 |
| NBW & WHZ ≥-2     | 74,596 | 241 | 1-0  | 0-5, 2-2  | 60,139 | 109 | 0-7 | 0-3, 1-4  | 38,869 | 36 | 0-4  | 0-2, 0-9  | 17,957 | 2 | 0-3     | 0-1, 0-6  |
| LBW & WHZ ≥-2     | 7,719  | 65  | 2-3  | 1-0, 5-2  | 5,826  | 15  | 0-9 | 0-4, 2-1  | 3,931  | 4  | 0-3  | 0-1, 1-0  | 2,086  | 0 | 0-1     | 0-0, 0-5  |
| NBW & WHZ <-2     | 4,447  | 18  | 1-4  | 0-6, 3-3  | 5,634  | 35  | 1-7 | 0-8, 3-8  | 3,380  | 13 | 2-1  | 0-9, 4-9  | 1,037  | 0 | 2-5     | 0-9, 7-0  |
| LBW & WHZ <-2     | 1,896  | 32  | 4-0  | 1-7, 9-3  | 1,879  | 14  | 3-3 | 1-4, 7-4  | 1,269  | 9  | 2-7  | 1-0, 7-2  | 414    | 0 | 2-2     | 0-6, 7-7  |
| Term & WHZ ≥-2    | 73,105 | 268 | 2-0  | 1-2, 3-4  | 57,925 | 110 | 1-2 | 0-7, 2-0  | 35,400 | 37 | 0-7  | 0-4, 1-2  | 10,328 | 2 | 0-4 0-8 | 0-2, 0-7  |
| PTB & WHZ ≥-2     | 10,801 | 49  | 3-4  | 1-9, 6-0  | 9,121  | 27  | 2-1 | 1-2, 3-7  | 5,272  | 9  | 1-3  | 0-6, 2-6  | 891    | 0 | 3-8     | 0-3, 1-9  |
| Term & WHZ <-2    | 4,249  | 35  | 3-9  | 2-2, 7-1  | 4,878  | 38  | 3-9 | 2-2, 6-8  | 2,413  | 15 | 3-8  | 2-0, 7-3  | 362    | 0 | 10-3    | 1-6, 8-7  |
| PTB & WHZ <-2     | 729    | 14  | 9-7  | 4-7, 20-0 | 851    | 10  | 9-9 | 5-3, 18-6 | 441    | 7  | 10-1 | 4-3, 23-9 | 32     | 0 | -       | 2-9, 35-7 |
| BF & MUAC ≥125    | 34,445 | 42  | 1-0  | 0-6, 1-9  | 63,418 | 110 | 1-0 | 0-6, 1-8  | 58,937 | 59 | 1-1  | 0-6, 1-9  | 936    | 4 | 1-1     | 0-5, 2-1  |
| No BF & MUAC ≥125 | 452    | 3   | 3-2  | 1-1, 9-1  | 1,316  | 11  | 2-8 | 1-4, 5-6  | 10,574 | 12 | 2-4  | 1-2, 4-8  | 3,468  | 2 | 2-1     | 0-7, 5-9  |
| BF & MUAC <125    | 13,304 | 35  | 2-1  | 1-1, 3-9  | 8,251  | 47  | 2-8 | 1-6, 4-9  | 5,104  | 21 | 3-7  | 2-0, 7-1  | 64     | 1 | 5-0     | 2-2, 11-4 |
| No BF & MUAC <125 | 141    | 3   | 5-4  | 1-2, 23-1 | 94     | 1   | 6-6 | 2-6, 16-6 | 1,108  | 2  | 8-0  | 2-9, 22-0 | 264    | 2 | 9-7     | 1-9, 48-2 |
| NBW & MUAC ≥125   | 38,552 | 99  | 1-4  | 0-8, 2-6  | 48,363 | 108 | 1-1 | 0-6, 2-0  | 32,485 | 41 | 0-9  | 0-3, 1-7  | 8,944  | 2 | 0-7     | 0-3, 1-4  |
| NBW & MUAC <125   | 3,225  | 16  | 2-2  | 1-1, 4-7  | 4,865  | 16  | 1-7 | 0-9, 3-4  | 3,107  | 8  | 1-4  | 0-3, 3-1  | 745    | 0 | 1-1     | 0-3, 3-2  |
| LBW & MUAC <125   | 22,849 | 153 | 2-8  | 1-5, 5-1  | 3,792  | 22  | 3-2 | 1-7, 6-2  | 1,291  | 8  | 3-7  | 1-7, 8-3  | 47     | 0 | 4-3     | 1-5, 12-0 |
| LBW & MUAC <125   | 5,611  | 142 | 11-5 | 6-3, 21-1 | 1,425  | 10  | 5-5 | 2-7, 11-2 | 560    | 5  | 2-6  | 0-9, 7-2  | 24     | 0 | 1-2     | 0-3, 5-0  |
| Term & MUAC ≥125  | 35,504 | 98  | 1-5  | 0-7, 3-1  | 44,378 | 100 | 1-1 | 0-5, 2-3  | 30,080 | 36 | 0-8  | 0-4, 1-8  | 9,456  | 2 | 0-6     | 0-3, 1-4  |
| PTB & MUAC ≥125   | 3,818  | 17  | 2-9  | 1-2, 6-5  | 5,722  | 19  | 2-5 | 1-2, 5-4  | 3,704  | 11 | 2-2  | 0-9, 5-1  | 559    | 0 | 1-9     | 0-6, 5-6  |
| Term & MUAC <125  | 21,433 | 182 | 3-3  | 1-6, 6-7  | 3,664  | 19  | 3-2 | 1-5, 6-9  | 1,283  | 10 | 3-2  | 1-3, 7-8  | 59     | 0 | 3-1     | 1-0, 9-4  |
| PTB & MUAC <125   | 3,578  | 86  | 13-9 | 6-7, 28-6 | 689    | 7   | 8-8 | 3-8, 20-4 | 264    | 4  | 5-6  | 1-7, 18-1 | 12     | 0 | -       | -         |

<sup>1</sup> Risk = predicted absolute risk of dying within 1 month per 1,000 child months modelled using generalized linear mixed effects models accounting for repeated measures in each child, clustering within studies, and time at risk

Abbreviations: BF = breastfeeding; HAZ = height-for-age Z-score; LBW= low birthweight (<2500g); MUAC = mid-upper arm circumference; NBW = normal birthweight (≥2500g); PTB = preterm birth (<37 weeks of gestation at birth); WAZ = weight-for-age Z-score; WHZ= weight-for-height Z-score

17  
18  
19  
20  
21

22 **Table 3: Absolute risk of death per 1000 child months by age group and by combinations of exposures in Anthropometry-Selected (A-S)**  
 23 **cohorts, i.e., enrolment on the basis of anthropometric deficit**

| Indicator       | <6 months |        |                   |           | 6-11 months |        |                   |           | 12-23 months |        |                   |           | 24-59 months |        |                   |           |
|-----------------|-----------|--------|-------------------|-----------|-------------|--------|-------------------|-----------|--------------|--------|-------------------|-----------|--------------|--------|-------------------|-----------|
|                 | N         | Deaths | Risk <sup>2</sup> | 95% CI    | N           | Deaths | Risk <sup>2</sup> | 95% CI    | N            | Deaths | Risk <sup>2</sup> | 95% CI    | N            | Deaths | Risk <sup>2</sup> | 95% CI    |
| BF & WAZ ≥-2    | 4,123     | 0      | 1.3               | 0.2, 8.9  | 2,439       | 8      | 1.6               | 0.3, 7.4  | 1,944        | 3      | 2.0               | 0.4, 9.5  | 113          | 1      | 2.5               | 0.3, 18.2 |
| No BF & WAZ ≥-2 | 40        | 0      | 0.8               | 0.0, 20.4 | 142         | 0      | 1.3               | 0.1, 13.7 | 983          | 4      | 2.3               | 0.4, 11.5 | 1,314        | 7      | 3.8               | 0.8, 17.4 |
| BF & WAZ <-2    | 3,706     | 16     | 13.3              | 3.3, 51.7 | 6,997       | 79     | 9.6               | 2.5, 36.3 | 9,283        | 74     | 7.0               | 1.8, 26.8 | 1,206        | 10     | 5.0               | 1.2, 20.7 |
| No BF & WAZ <-2 | 52        | 1      | 33.9              | 7.7, 136  | 390         | 15     | 19.4              | 4.8, 74.8 | 3,129        | 48     | 11.0              | 2.8, 41.8 | 5,041        | 49     | 6.2               | 1.6, 24.3 |
| NBW & WAZ ≥-2   | 1         | 0      | ..                | ..        | 570         | 5      | 7.5               | 3.2, 17.6 | 507          | 2      | 3.6               | 1.0, 13.4 | 64           | 0      | 1.8               | 0.1, 25.7 |
| LBW & WAZ ≥-2   | 0         | 0      | ..                | ..        | 10          | 0      | ..                | ..        | 17           | 0      | ..                | ..        | 4            | 0      | ..                | ..        |
| NBW & WAZ <-2   | 0         | 0      | ..                | ..        | 1,564       | 15     | 10.1              | 6.4, 16.2 | 2,141        | 19     | 8.5               | 5.9, 12.2 | 528          | 3      | 7.1               | 3.4, 15.0 |
| LBW & WAZ <-2   | 0         | 0      | ..                | ..        | 90          | 1      | 7.8               | 1.1, 54.7 | 117          | 1      | 12.5              | 4.0, 38.4 | 37           | 1      | 20.1              | 2.7, 134  |
| Term & WAZ ≥-2  | 0         | 0      | ..                | ..        | 0           | 0      | ..                | ..        | 0            | 0      | ..                | ..        | 0            | 0      | ..                | ..        |
| PTB & WAZ ≥-2   | 0         | 0      | ..                | ..        | 0           | 0      | ..                | ..        | 0            | 0      | ..                | ..        | 0            | 0      | ..                | ..        |
| Term & WAZ <-2  | 0         | 0      | ..                | ..        | 0           | 0      | ..                | ..        | 0            | 0      | ..                | ..        | 0            | 0      | ..                | ..        |
| PTB & WAZ <-2   | 0         | 0      | ..                | ..        | 0           | 0      | ..                | ..        | 0            | 0      | ..                | ..        | 0            | 0      | ..                | ..        |
| BF & WAZ ≥-3    | 6,814     | 3      | 2.7               | 0.6, 11.3 | 5,911       | 23     | 2.8               | 0.8, 10.3 | 6,122        | 17     | 3.0               | 0.8, 11.0 | 480          | 1      | 3.1               | 0.7, 13.7 |
| No BF & WAZ ≥-3 | 65        | 0      | 6.0               | 1.0, 36.4 | 266         | 3      | 5.8               | 1.3, 25.6 | 2,259        | 14     | 5.6               | 1.5, 20.5 | 3,202        | 21     | 5.4               | 1.4, 19.9 |
| BF & WAZ <-3    | 1,015     | 13     | 22.9              | 6.3, 79.8 | 3,525       | 64     | 15.4              | 4.4, 52.1 | 5,105        | 60     | 10.3              | 2.9, 35.7 | 839          | 10     | 6.9               | 1.8, 25.8 |
| No BF & WAZ <-3 | 27        | 1      | 48.4              | 11.8, 177 | 266         | 12     | 26.4              | 7.2, 92.5 | 1,853        | 38     | 14.2              | 4.0, 49.0 | 3,153        | 35     | 7.6               | 2.1, 27.2 |
| NBW & WAZ ≥-3   | 1         | 0      | ..                | ..        | 1,590       | 12     | 7.7               | 4.6, 13.1 | 1,661        | 12     | 6.1               | 3.6, 10.4 | 219          | 0      | 4.9               | 1.6, 14.7 |
| LBW & WAZ ≥-3   | 0         | 0      | ..                | ..        | 34          | 0      | 6.9               | 0.2, 17.4 | 60           | 1      | 7.7               | 1.1, 52.7 | 25           | 0      | 8.5               | 0.3, 209  |
| NBW & WAZ <-3   | 0         | 0      | ..                | ..        | 544         | 8      | 14.4              | 7.4, 27.7 | 987          | 9      | 10.2              | 6.4, 16.3 | 373          | 3      | 7.2               | 2.8, 18.4 |
| LBW & WAZ <-3   | 0         | 0      | ..                | ..        | 66          | 1      | 6.5               | 0.5, 73.4 | 74           | 0      | 14.8              | 3.7, 57.9 | 16           | 1      | ..                | ..        |
| Term & WAZ ≥-3  | 0         | 0      | ..                | ..        | 0           | 0      | ..                | ..        | 0            | 0      | ..                | ..        | 0            | 0      | ..                | ..        |
| PTB & WAZ ≥-3   | 0         | 0      | ..                | ..        | 0           | 0      | ..                | ..        | 0            | 0      | ..                | ..        | 0            | 0      | ..                | ..        |
| Term & WAZ <-3  | 0         | 0      | ..                | ..        | 0           | 0      | ..                | ..        | 0            | 0      | ..                | ..        | 0            | 0      | ..                | ..        |
| PTB & WAZ <-3   | 0         | 0      | ..                | ..        | 0           | 0      | ..                | ..        | 0            | 0      | ..                | ..        | 0            | 0      | ..                | ..        |
| BF & HAZ ≥-2    | 4,099     | 2      | 5.1               | 1.0, 24.8 | 3,775       | 19     | 3.4               | 0.8, 14.1 | 2,357        | 5      | 2.3               | 0.5, 10.8 | 158          | 0      | 1.6               | 0.2, 10.5 |
| No BF & HAZ ≥-2 | 41        | 0      | 2.6               | 0.2, 32.8 | 193         | 1      | 3.2               | 0.5, 21.4 | 823          | 5      | 3.9               | 0.9, 17.7 | 1,115        | 6      | 4.8               | 1.0, 22.4 |
| BF & HAZ <-2    | 3,643     | 14     | 14.8              | 3.6, 58.4 | 5,646       | 68     | 10.1              | 2.6, 38.8 | 8,865        | 72     | 6.9               | 1.7, 26.9 | 1,161        | 11     | 4.7               | 1.1, 19.6 |
| No BF & HAZ <-2 | 50        | 1      | 36.3              | 8.1, 148  | 339         | 14     | 19.6              | 4.8, 76.9 | 3,288        | 47     | 10.5              | 2.7, 40.5 | 5,237        | 50     | 5.6               | 1.4, 22.2 |
| NBW & HAZ ≥-2   | 1         | 0      | ..                | ..        | 765         | 6      | 7.4               | 3.4, 16.1 | 481          | 3      | 6.0               | 2.1, 17.1 | 52           | 0      | 4.9               | 0.6, 41.1 |
| LBW & HAZ ≥-2   | 0         | 0      | ..                | ..        | 10          | 0      | ..                | ..        | 15           | 0      | ..                | ..        | 13           | 0      | ..                | ..        |
| NBW & HAZ <-2   | 0         | 0      | ..                | ..        | 1,367       | 14     | 10.4              | 6.4, 16.9 | 2,162        | 18     | 8.1               | 5.6, 11.7 | 539          | 3      | 6.3               | 2.9, 13.5 |
| LBW & HAZ <-2   | 0         | 0      | ..                | ..        | 90          | 1      | 7.3               | 1.0, 52.7 | 119          | 1      | 12.9              | 4.1, 39.6 | 28           | 1      | 22.8              | 3.0, 153  |
| Term & HAZ ≥-2  | 0         | 0      | ..                | ..        | 0           | 0      | ..                | ..        | 0            | 0      | ..                | ..        | 0            | 0      | ..                | ..        |
| PTB & HAZ ≥-2   | 0         | 0      | ..                | ..        | 0           | 0      | ..                | ..        | 0            | 0      | ..                | ..        | 0            | 0      | ..                | ..        |
| Term & HAZ <-2  | 0         | 0      | ..                | ..        | 0           | 0      | ..                | ..        | 0            | 0      | ..                | ..        | 0            | 0      | ..                | ..        |
| PTB & HAZ <-2   | 0         | 0      | ..                | ..        | 0           | 0      | ..                | ..        | 0            | 0      | ..                | ..        | 0            | 0      | ..                | ..        |
| BF & WHZ ≥-2    | 6,966     | 8      | 3.8               | 0.9, 15.9 | 5,381       | 22     | 3.5               | 0.9, 13.1 | 5,917        | 15     | 3.2               | 0.8, 12.4 | 601          | 4      | 3.0               | 0.7, 13.4 |
| No BF & WHZ ≥-2 | 75        | 0      | 5.9               | 0.9, 37.0 | 259         | 2      | 5.5               | 1.2, 25.3 | 2,457        | 16     | 5.1               | 1.3, 19.6 | 3,854        | 24     | 4.7               | 1.2, 18.2 |

|                   |       |    |      |           |       |    |      |           |       |    |      |           |       |    |      |           |
|-------------------|-------|----|------|-----------|-------|----|------|-----------|-------|----|------|-----------|-------|----|------|-----------|
| BF & WHZ <-2      | 771   | 8  | 17.9 | 4-6, 66.4 | 4,038 | 65 | 13.1 | 3-6, 46.9 | 5,305 | 62 | 9.6  | 2-6, 35.0 | 717   | 7  | 7.0  | 1-8, 27.6 |
| No BF & WHZ <-2   | 16    | 1  | ..   | ..        | 273   | 13 | 24.2 | 6.2, 89.1 | 1,652 | 36 | 14.7 | 4.0, 52.7 | 2,497 | 32 | 8.8  | 2.3, 33.0 |
| NBW & WHZ ≥-2     | 1     | 0  | ..   | ..        | 1,645 | 15 | 8.5  | 5.2, 13.9 | 1,754 | 11 | 6.6  | 4.1, 10.5 | 338   | 2  | 5.1  | 1.9, 13.3 |
| LBW & WHZ ≥-2     | 0     | 0  | ..   | ..        | 81    | 1  | 12.6 | 2.1, 73.1 | 91    | 1  | 7.7  | 1.3, 45.0 | 20    | 0  | 4.6  | 0.1, 162  |
| NBW & WHZ <-2     | 0     | 0  | ..   | ..        | 486   | 5  | 12.1 | 5.7, 25.5 | 888   | 10 | 10.0 | 5.9, 16.8 | 253   | 1  | 8.2  | 2.8, 23.8 |
| LBW & WHZ <-2     | 0     | 0  | ..   | ..        | 19    | 0  | ..   | ..        | 43    | 0  | 0.0  | 0, 1000   | 21    | 1  | 57.9 | 7.7, 327  |
| Term & WHZ ≥-2    | 0     | 0  | ..   | ..        | 0     | 0  | ..   | ..        | 0     | 0  | ..   | ..        | 0     | 0  | ..   | ..        |
| PTB & WHZ ≥-2     | 0     | 0  | ..   | ..        | 0     | 0  | ..   | ..        | 0     | 0  | ..   | ..        | 0     | 0  | ..   | ..        |
| Term & WHZ <-2    | 0     | 0  | ..   | ..        | 0     | 0  | ..   | ..        | 0     | 0  | ..   | ..        | 0     | 0  | ..   | ..        |
| PTB & WHZ <-2     | 0     | 0  | ..   | ..        | 0     | 0  | ..   | ..        | 0     | 0  | ..   | ..        | 0     | 0  | ..   | ..        |
| BF & MUAC ≥125    | 3,226 | 1  | 2.5  | 0.4, 15.2 | 2,201 | 6  | 2.1  | 0.4, 9.9  | 3,903 | 8  | 1.8  | 0.4, 8.3  | 602   | 1  | 1.5  | 0.2, 9.0  |
| No BF & MUAC ≥125 | 42    | 0  | 7.9  | 1.0, 60.8 | 157   | 2  | 5.9  | 1.0, 32.8 | 1,737 | 11 | 4.5  | 1.0, 20.1 | 4,072 | 21 | 3.4  | 0.8, 15.0 |
| BF & MUAC <125    | 4,573 | 14 | 10.3 | 2.4, 44.2 | 7,207 | 81 | 9.0  | 2.1, 37.3 | 7,301 | 69 | 7.9  | 1.9, 33.1 | 708   | 10 | 6.9  | 1.5, 30.9 |
| No BF & MUAC <125 | 49    | 1  | 21.8 | 4.4, 100  | 372   | 13 | 15.8 | 3.6, 67.8 | 2,368 | 41 | 11.5 | 2.7, 47.7 | 2,264 | 35 | 8.3  | 1.9, 35.6 |
| NBW & MUAC ≥125   | 0     | 0  | ..   | ..        | 438   | 2  | 4.9  | 1.8, 13.2 | 949   | 8  | 5.9  | 3.3, 10.8 | 279   | 1  | 7.2  | 2.3, 22.1 |
| NBW & MUAC <125   | 0     | 0  | ..   | ..        | 15    | 0  | ..   | ..        | 47    | 0  | 0.0  | 0.0, 1000 | 18    | 0  | ..   | ..        |
| LBW & MUAC <125   | 1     | 0  | ..   | ..        | 1693  | 18 | 11.2 | 7.1, 17.5 | 1,700 | 13 | 8.4  | 5.4, 13.1 | 313   | 2  | 6.4  | 2.5, 15.8 |
| LBW & MUAC <125   | 0     | 0  | ..   | ..        | 85    | 1  | 8.8  | 1.2, 61.6 | 87    | 1  | 19.0 | 6.1, 58.0 | 23    | 1  | 40.5 | 5.5, 244  |
| Term & MUAC ≥125  | 0     | 0  | ..   | ..        | 0     | 0  | ..   | ..        | 0     | 0  | ..   | ..        | 0     | 0  | ..   | ..        |
| PTB & MUAC ≥125   | 0     | 0  | ..   | ..        | 0     | 0  | ..   | ..        | 0     | 0  | ..   | ..        | 0     | 0  | ..   | ..        |
| Term & MUAC <125  | 0     | 0  | ..   | ..        | 0     | 0  | ..   | ..        | 0     | 0  | ..   | ..        | 0     | 0  | ..   | ..        |
| PTB & MUAC <125   | 0     | 0  | ..   | ..        | 0     | 0  | ..   | ..        | 0     | 0  | ..   | ..        | 0     | 0  | ..   | ..        |

24 <sup>1</sup> Risk = predicted absolute risk of dying within 1 month per 1,000 child months modelled using generalized linear mixed effects models accounting for repeated measures in  
 25 each child, clustering within studies, and time at risk

26 Abbreviations: BF = breastfeeding; HAZ = height-for-age Z-score; LBW= low birthweight (<2500g); MUAC = mid-upper arm circumference; NBW = normal birthweight  
 27 (≥2500g); PTB = preterm birth (<37 weeks of gestation at birth); WAZ = weight-for-age Z-score; WHZ= weight-for-height Z-score

28 **Table 4: Absolute risk of death per 1000 child months by age group and by combinations of exposures in Illness-Selected (I-S) cohorts,**  
 29 **i.e., enrolment on the basis of the presence of illness**

| Indicator             | <6 months |        |                   |            | 6-11 months |        |                   |            | 12-23 months |        |                   |            | 24-59 months |        |                   |           |
|-----------------------|-----------|--------|-------------------|------------|-------------|--------|-------------------|------------|--------------|--------|-------------------|------------|--------------|--------|-------------------|-----------|
|                       | N         | Deaths | Risk <sup>1</sup> | 95% CI     | N           | Deaths | Risk <sup>1</sup> | 95% CI     | N            | Deaths | Risk <sup>1</sup> | 95% CI     | N            | Deaths | Risk <sup>1</sup> | 95% CI    |
| BF & WAZ $\geq$ -2    | 2,235     | 181    | 3.6               | 1.3, 9.8   | 2,255       | 63     | 3.0               | 1.2, 7.5   | 2,533        | 39     | 2.6               | 0.9, 7.4   | 190          | 0      | 2.2               | 0.5, 8.8  |
| No BF & WAZ $\geq$ -2 | 88        | 7      | 6.8               | 1.5, 29.4  | 384         | 19     | 6.0               | 1.9, 18.7  | 1,353        | 55     | 5.3               | 2.0, 13.8  | 1,371        | 85     | 4.7               | 1.7, 13.0 |
| BF & WAZ <-2          | 1,045     | 230    | 30.7              | 11.6, 78.9 | 1,560       | 120    | 20.5              | 8.4, 49.5  | 2,107        | 86     | 13.7              | 5.0, 36.5  | 192          | 2      | 9.1               | 2.6, 30.7 |
| No BF & WAZ <-2       | 226       | 37     | 59.6              | 18.6, 174  | 563         | 74     | 37.3              | 14.1, 95.2 | 1,249        | 119    | 23.2              | 9.2, 57.5  | 598          | 55     | 14.3              | 5.0, 40.4 |
| NBW & WAZ $\geq$ -2   | 2,164     | 178    | 5.0               | 3.4, 7.3   | 1,818       | 56     | 3.9               | 3.0, 5.1   | 2,617        | 57     | 3.1               | 2.2, 4.4   | 1,056        | 59     | 2.5               | 1.4, 4.2  |
| LBW & WAZ $\geq$ -2   | 46        | 5      | 15.1              | 1.8, 115.6 | 154         | 2      | 8.2               | 2.2, 29.8  | 289          | 3      | 4.4               | 0.9, 22.0  | 51           | 2      | 2.4               | 0.2, 34.6 |
| NBW & WAZ <-2         | 835       | 192    | 41.6              | 26.2, 65.4 | 1,023       | 102    | 24.4              | 17.9, 33.2 | 1,902        | 126    | 14.2              | 9.8, 20.6  | 512          | 43     | 8.3               | 4.6, 14.8 |
| LBW & WAZ <-2         | 239       | 46     | 19.4              | 7.2, 51.1  | 375         | 24     | 18.0              | 9.0, 35.4  | 528          | 19     | 16.7              | 6.4, 42.9  | 54           | 3      | 15.5              | 3.3, 68.6 |
| Term & WAZ $\geq$ -2  | 1,919     | 171    | 3.3               | 0.6, 19.1  | 800         | 43     | 3.9               | 0.7, 21.2  | 936          | 50     | 4.6               | 0.8, 26.4  | 813          | 60     | 5.4               | 0.8, 36.2 |
| PTB & WAZ $\geq$ -2   | 34        | 5      | 5.1               | 0.2, 139   | 20          | 0      | 3.5               | 0.2, 65.8  | 15           | 0      | ..                | ..         | 15           | 1      | ..                | ..        |
| Term & WAZ <-2        | 553       | 172    | 46.2              | 7.7, 232   | 278         | 46     | 31.0              | 5.6, 155   | 428          | 76     | 20.7              | 3.5, 114   | 357          | 40     | 13.7              | 1.9, 92.6 |
| PTB & WAZ <-2         | 132       | 34     | 28.5              | 3.2, 210   | 28          | 5      | 28.0              | 3.2, 203   | 18           | 5      | ..                | ..         | 12           | 1      | ..                | ..        |
| BF & WAZ $\geq$ -3    | 2,671     | 261    | 4.8               | 1.9, 12.2  | 2,968       | 94     | 3.7               | 1.6, 8.4   | 3,619        | 61     | 2.8               | 1.1, 7.3   | 299          | 1      | 2.1               | 0.6, 7.5  |
| No BF & WAZ $\geq$ -3 | 145       | 13     | 8.6               | 2.3, 31.1  | 549         | 25     | 7.0               | 2.5, 19.3  | 1,871        | 86     | 5.8               | 2.4, 13.7  | 1,711        | 109    | 4.7               | 1.8, 12.0 |
| BF & WAZ <-3          | 609       | 150    | 45.3              | 17.0, 115  | 847         | 89     | 34.3              | 14.4, 79.6 | 1,021        | 64     | 26.0              | 9.4, 69.5  | 83           | 1      | 19.6              | 5.1, 72.1 |
| No BF & WAZ <-3       | 169       | 31     | 69.4              | 20.7, 208  | 398         | 68     | 52.0              | 20.0, 129  | 731          | 88     | 38.7              | 15.5, 93.7 | 258          | 31     | 28.8              | 9.3, 85.3 |
| NBW & WAZ $\geq$ -3   | 2,537     | 250    | 6.3               | 4.5, 8.9   | 2,278       | 83     | 4.8               | 3.8, 6.2   | 3,539        | 95     | 3.7               | 2.7, 5.0   | 1,366        | 81     | 2.8               | 1.7, 4.5  |
| LBW & WAZ $\geq$ -3   | 101       | 12     | 7.7               | 1.3, 43.1  | 293         | 3      | 4.2               | 1.3, 13.0  | 500          | 4      | 2.2               | 0.4, 11.1  | 68           | 2      | 1.2               | 0.1, 16.3 |
| NBW & WAZ <-3         | 462       | 120    | 59.8              | 32.4, 108  | 563         | 75     | 38.2              | 25.5, 56.9 | 880          | 88     | 24.2              | 14.6, 39.9 | 202          | 21     | 15.3              | 6.7, 34.3 |
| LBW & WAZ <-3         | 184       | 39     | 28.5              | 9.3, 83.9  | 236         | 23     | 32.7              | 15.0, 69.6 | 317          | 18     | 37.5              | 13.0, 103  | 37           | 3      | 42.9              | 8.0, 200  |
| Term & WAZ $\geq$ -3  | 2,183     | 235    | 4.5               | 0.7, 26.9  | 934         | 59     | 5.0               | 0.9, 28.5  | 1,154        | 78     | 5.6               | 0.9, 33.2  | 1,027        | 80     | 6.3               | 0.9, 42.2 |
| PTB & WAZ $\geq$ -3   | 61        | 10     | 7.6               | 0.5, 112   | 24          | 0      | 3.7               | 0.2, 55.9  | 22           | 0      | 1.8               | 0.0, 96.9  | 20           | 1      | 0.9               | 0.0, 245  |
| Term & WAZ <-3        | 289       | 108    | 79.7              | 12.2, 379  | 144         | 30     | 52.9              | 0.2, 55.9  | 210          | 48     | 34.8              | 5.3, 197   | 143          | 20     | 22.7              | 2.6, 172  |
| PTB & WAZ <-3         | 105       | 29     | 33.6              | 3.4, 263   | 24          | 5      | 48.8              | 8.9, 259   | 11           | 5      | -                 | -          | 7            | 1      | -                 | -         |
| BF & HAZ $\geq$ -2    | 2,357     | 227    | 5.5               | 2.6, 11.5  | 2,474       | 91     | 4.0               | 2.1, 7.5   | 2,334        | 45     | 2.9               | 1.3, 6.8   | 179          | 0      | 2.1               | 0.6, 7.1  |
| No BF & HAZ $\geq$ -2 | 128       | 16     | 15.1              | 4.7, 47.1  | 433         | 35     | 9.5               | 4.1, 22.1  | 1,157        | 71     | 6.0               | 3.0, 12.0  | 1,305        | 77     | 3.8               | 1.7, 8.4  |
| BF & HAZ <-2          | 915       | 182    | 26.9              | 12.3, 57.7 | 1,335       | 91     | 16.0              | 8.3, 30.6  | 2,300        | 77     | 9.4               | 4.3, 20.7  | 203          | 2      | 5.6               | 1.9, 16.5 |
| No BF & HAZ <-2       | 183       | 28     | 47.9              | 16.3, 132  | 507         | 57     | 31.3              | 14.1, 67.9 | 1,435        | 98     | 20.3              | 10.2, 40.2 | 657          | 61     | 13.1              | 5.6, 30.4 |
| NBW & HAZ $\geq$ -2   | 2,236     | 219    | 6.6               | 4.7, 9.5   | 2,023       | 83     | 4.9               | 3.8, 6.3   | 2,360        | 73     | 3.6               | 2.5, 5.1   | 1,011        | 53     | 2.6               | 1.5, 4.5  |
| LBW & HAZ $\geq$ -2   | 77        | 10     | 9.1               | 1.4, 57.6  | 161         | 4      | 6.1               | 1.8, 20.8  | 228          | 3      | 4.1               | 0.7, 22.5  | 38           | 3      | 2.8               | 0.2, 43.9 |
| NBW & HAZ <-2         | 729       | 149    | 31.0              | 18.5, 51.6 | 813         | 74     | 18.8              | 13.3, 26.4 | 2,048        | 104    | 11.3              | 7.6, 16.7  | 551          | 45     | 6.8               | 3.7, 12.5 |
| LBW & HAZ <-2         | 208       | 41     | 25.0              | 8.6, 70.7  | 367         | 22     | 20.2              | 9.8, 41.0  | 589          | 19     | 16.2              | 6.2, 41.6  | 67           | 2      | 13.1              | 2.8, 58.1 |
| Term & HAZ $\geq$ -2  | 1,960     | 206    | 4.9               | 1.3, 18.8  | 885         | 57     | 4.7               | 1.3, 16.9  | 917          | 58     | 4.5               | 1.1, 17.3  | 830          | 53     | 4.3               | 0.9, 20.1 |
| PTB & HAZ $\geq$ -2   | 48        | 10     | 12.3              | 0.9, 146   | 24          | 1      | 9.0               | 1.0, 74.2  | 18           | 1      | ..                | ..         | 19           | 2      | ..                | ..        |
| Term & HAZ <-2        | 508       | 136    | 33.2              | 7.9, 128   | 188         | 31     | 23.7              | 6.3, 84.8  | 438          | 63     | 16.9              | 4.2, 65.3  | 334          | 43     | 12.0              | 2.4, 58.3 |

|                         |       |     |      |            |       |     |      |            |       |     |      |            |       |     |      |            |
|-------------------------|-------|-----|------|------------|-------|-----|------|------------|-------|-----|------|------------|-------|-----|------|------------|
| PTB & HAZ <-2           | 118   | 29  | 29-7 | 4-3, 177   | 23    | 4   | 23-1 | 3-1, 152   | 15    | 4   | ..   | ..         | 8     | 0   | ..   | ..         |
| BF & WHZ $\geq$ -2      | 2,270 | 228 | 7-0  | 3-8, 13-0  | 2,668 | 77  | 4-2  | 2-5, 7-1   | 3,267 | 48  | 2-6  | 1-3, 5-2   | 290   | 1   | 1-6  | 0-5, 4-4   |
| No BF & WHZ $\geq$ -2   | 165   | 14  | 12-7 | 4-4, 36-0  | 526   | 26  | 9-1  | 4-4, 18-9  | 1,736 | 65  | 6-5  | 3-7, 11-5  | 1,462 | 88  | 4-7  | 2-4, 9-2   |
| BF & WHZ <-2            | 956   | 165 | 16-2 | 8-3, 31-0  | 1,140 | 105 | 14-6 | 8-6, 24-8  | 1,367 | 74  | 13-2 | 6-5, 26-6  | 91    | 1   | 12-0 | 4-2, 33-4  |
| No BF & WHZ <-2         | 146   | 30  | 52-2 | 20-5, 126  | 414   | 66  | 33-0 | 17-0, 63-1 | 855   | 104 | 20-7 | 11-6, 36-8 | 493   | 46  | 12-9 | 6-0, 27-6  |
| NBW & WHZ $\geq$ -2     | 2,114 | 212 | 7-6  | 5-3, 10-7  | 2,006 | 67  | 5-4  | 4-2, 6-9   | 3,211 | 78  | 3-8  | 2-8, 5-3   | 1,180 | 64  | 2-7  | 1-6, 4-5   |
| LBW & WHZ $\geq$ -2     | 143   | 20  | 21-6 | 5-7, 77-9  | 321   | 7   | 9-3  | 3-9, 22-0  | 498   | 5   | 3-9  | 1-1, 14-4  | 75    | 2   | 1-7  | 0-2, 14-2  |
| NBW & WHZ <-2           | 849   | 149 | 20-0 | 12-5, 31-8 | 830   | 90  | 15-8 | 11-5, 21-7 | 1,197 | 99  | 12-4 | 8-3, 18-6  | 380   | 33  | 9-8  | 5-2, 18-4  |
| LBW & WHZ <-2           | 125   | 22  | 10-6 | 3-0, 37-2  | 207   | 19  | 17-2 | 7-6, 38-3  | 319   | 17  | 27-5 | 9-8, 75-0  | 30    | 3   | 43-9 | 8-3, 202   |
| Term & WHZ $\geq$ -2    | 1,781 | 199 | 5-1  | 1-1, 23-4  | 749   | 46  | 5-1  | 1-2, 22-2  | 963   | 61  | 5-1  | 1-1, 23-7  | 848   | 64  | 5-2  | 0-9, 28-0  |
| PTB & WHZ $\geq$ -2     | 72    | 15  | 16-5 | 1-5, 155   | 24    | 2   | 10-6 | 1-2, 88-4  | 19    | 2   | ..   | ..         | 16    | 1   | ..   | ..         |
| Term & WHZ <-2          | 667   | 133 | 16-9 | 3-4, 78-7  | 324   | 42  | 15-2 | 3-4, 65-5  | 392   | 60  | 13-6 | 2-8, 63-6  | 314   | 31  | 12-2 | 2-0, 70-3  |
| PTB & WHZ <-2           | 70    | 19  | 31-1 | 3-1, 251   | 14    | 3   | ..   | ..         | 14    | 3   | ..   | ..         | 11    | 1   | ..   | ..         |
| BF & MUAC $\geq$ 125    | 969   | 49  | 3-2  | 1-4, 7-4   | 2,428 | 59  | 2-7  | 1-4, 5-0   | 3,374 | 51  | 2-2  | 1-0, 4-9   | 322   | 0   | 1-9  | 0-6, 5-9   |
| No BF & MUAC $\geq$ 125 | 50    | 3   | 6-4  | 1-6, 24-4  | 435   | 22  | 5-5  | 2-1, 14-0  | 1,810 | 70  | 4-7  | 2-4, 9-1   | 1,837 | 118 | 4-0  | 2-0, 8-2   |
| BF & MUAC <125          | 2,308 | 361 | 17-0 | 8-6, 33-1  | 1,390 | 126 | 19-2 | 10-6, 34-5 | 1,268 | 74  | 21-7 | 10-0, 46-4 | 60    | 2   | 24-5 | 8-2, 71-0  |
| No BF & MUAC <125       | 264   | 41  | 35-6 | 13-2, 92-2 | 511   | 71  | 40-7 | 20-1, 80-8 | 794   | 105 | 46-6 | 22-9, 92-4 | 131   | 25  | 53-2 | 19-8, 136  |
| NBW & MUAC $\geq$ 125   | 886   | 46  | 2-8  | 1-5, 5-0   | 1,875 | 52  | 3-0  | 2-1, 4-3   | 3,309 | 80  | 3-2  | 2-4, 4-4   | 1,463 | 84  | 3-5  | 2-2, 5-6   |
| NBW & MUAC $\geq$ 125   | 45    | 4   | 7-7  | 0-7, 77-2  | 228   | 3   | 5-7  | 1-5, 21-6  | 514   | 4   | 4-3  | 1-2, 15-5  | 82    | 3   | 3-2  | 0-3, 31-1  |
| LBW & MUAC <125         | 2,110 | 323 | 16-4 | 11-7, 22-9 | 966   | 107 | 20-4 | 15-3, 27-1 | 1,110 | 103 | 25-4 | 15-7, 40-8 | 105   | 18  | 31-6 | 15-0, 65-2 |
| LBW & MUAC <125         | 240   | 47  | 20-9 | 7-8, 54-7  | 303   | 23  | 23-9 | 11-8, 47-9 | 304   | 18  | 27-4 | 9-5, 76-3  | 23    | 2   | 31-3 | 5-8, 152   |
| Term & MUAC $\geq$ 125  | 706   | 49  | 2-8  | 1-4, 5-5   | 827   | 40  | 3-0  | 2-0, 4-6   | 1,117 | 70  | 3-2  | 2-3, 4-7   | 1,109 | 84  | 3-5  | 2-0, 6-0   |
| PTB & MUAC $\geq$ 125   | 26    | 0   | 0-4  | 0-0, 153   | 24    | 1   | 0-9  | 0-0, 43-2  | 23    | 1   | 2-1  | 0-1, 29-5  | 25    | 2   | 4-9  | 0-1, 160   |
| Term & MUAC <125        | 1,763 | 293 | 15-7 | 10-6, 23-3 | 250   | 49  | 22-2 | 14-5, 33-9 | 247   | 56  | 31-4 | 14-8, 65-6 | 61    | 16  | 44-2 | 14-0, 131  |
| PTB & MUAC <125         | 140   | 39  | 49-1 | 13-5, 162  | 24    | 4   | 38-5 | 6-1, 207   | 10    | 4   | ..   | ..         | 2     | 0   | ..   | ..         |

<sup>1</sup> Risk = predicted absolute risk of dying within 1 month per 1,000 child months modelled using generalized linear mixed effects models accounting for repeated measures in each child, clustering within studies, and time at risk

Abbreviations: BF = breastfeeding; HAZ = height-for-age Z-score; LBW= low birthweight (<2500g); MUAC = mid-upper arm circumference; NBW = normal birthweight ( $\geq$ 2500g); PTB = preterm birth (<37 weeks of gestation at birth); WAZ = weight-for-age Z-score; WHZ= weight-for-height Z-score

30  
31  
32  
33  
34



**Signed data pooling agreement**  
95 datasets

**Excluded using inclusion criteria**

- 1 study: no weight data
- 1 study: cross-sectional study

**Pooled dataset**  
33 studies  
572 491 observation timepoints  
76 375 children

**Data cleaning**

Rows excluded from dataset

- Re-structuring: 1 228\*
- Duplicates: 949
- Sex not reported: 1 047
- Missing age at assessment: 22 342
- Reported age at assessment outside of range 0-60 months: 176

Single values set to missing

- Anthropometry: 54
- Diarrhea: 1
- Fever: 1

**Analysis pooled dataset**  
33 studies  
546 459 observation timepoints  
75 287 children

**GP**  
23 studies /  
49 740 children

**Observations per age group (months):**

- <6: 142 059
- 6-11: 135 464
- 12-23: 150 232
- 24-59: 35 450

**A-S**  
6 studies /  
14 759 children

**Observations per age group (months):**

- <6: 10 767
- 6-11: 16 734
- 12-23: 23 090
- 24-59: 13 929

**I-S**  
4 studies /  
10 788 children

**Observations per age group (months):**

- <6: 3 625
- 6-11: 4 999
- 12-23: 7 676
- 24-59: 2 434

\*Restructuring the format of the dataset from wide to long, and from balanced to unbalanced

A) All children

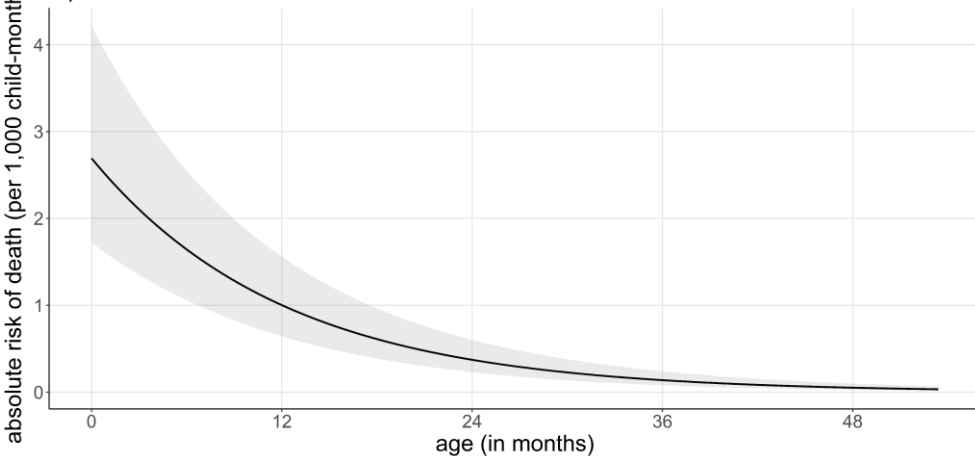

B) WAZ

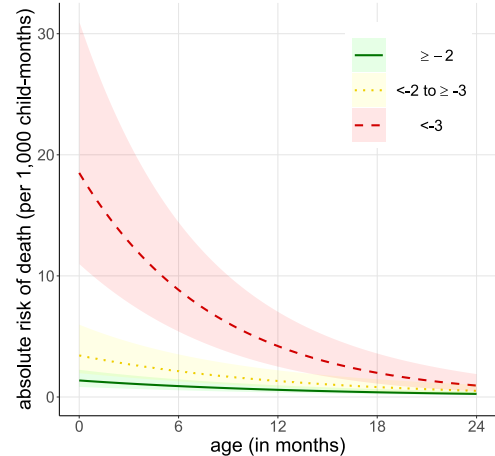

C) HAZ

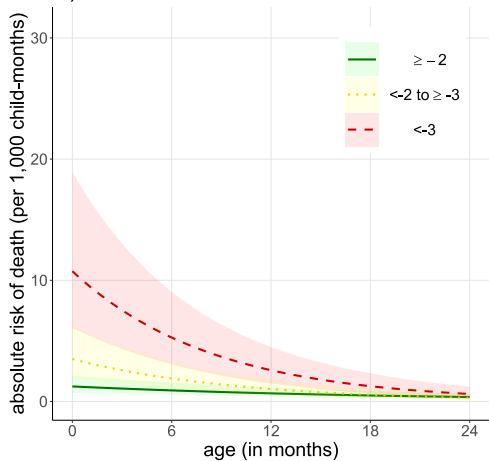

D) WHZ

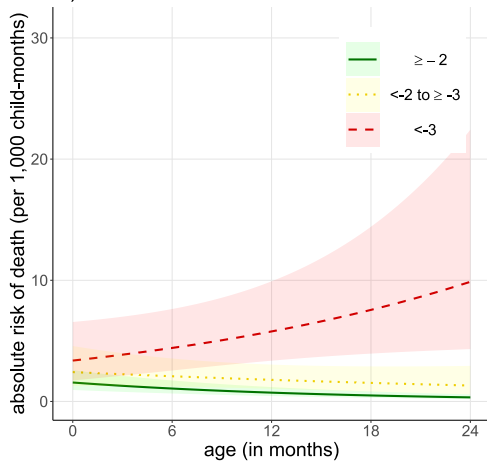

E) MUAC

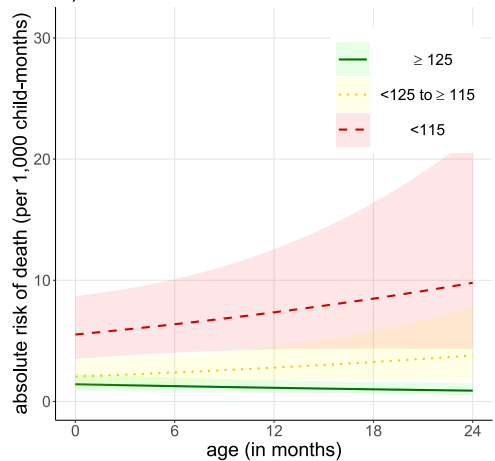

F) Breastfeeding

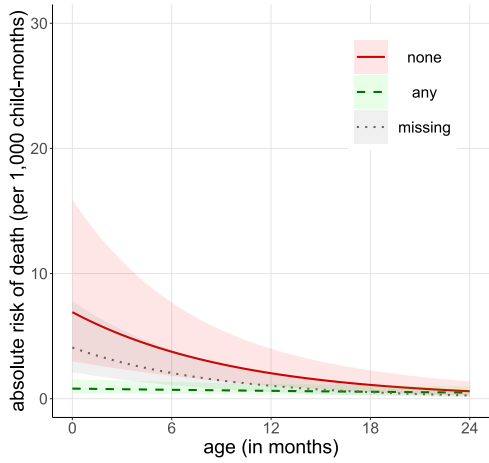

G) Birthweight

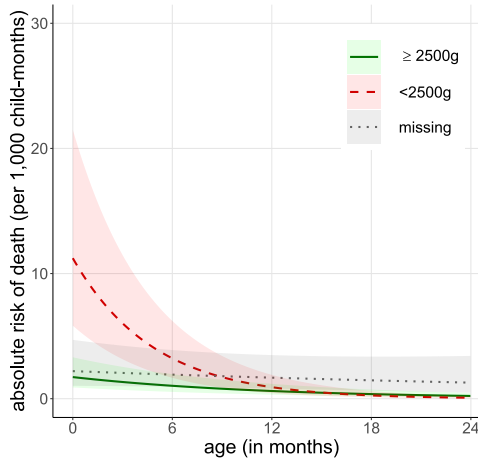

H) Preterm birth

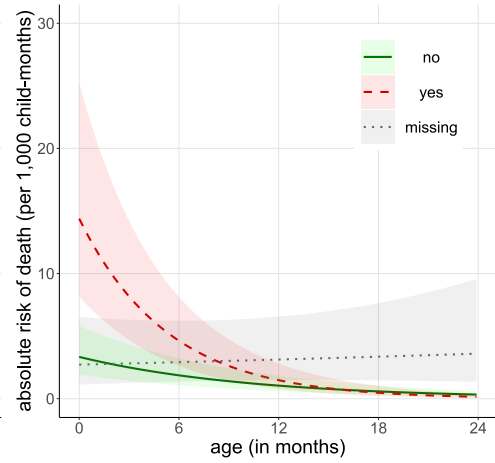

medRxiv preprint doi: <https://doi.org/10.1101/2024.07.06.24309988>; this version posted July 7, 2024. The copyright holder for this preprint (which was not certified by peer review) is the author/funder, who has granted medRxiv a license to display the preprint in perpetuity. It is made available under a [CC-BY-NC-ND 4.0 International license](https://creativecommons.org/licenses/by-nc-nd/4.0/).

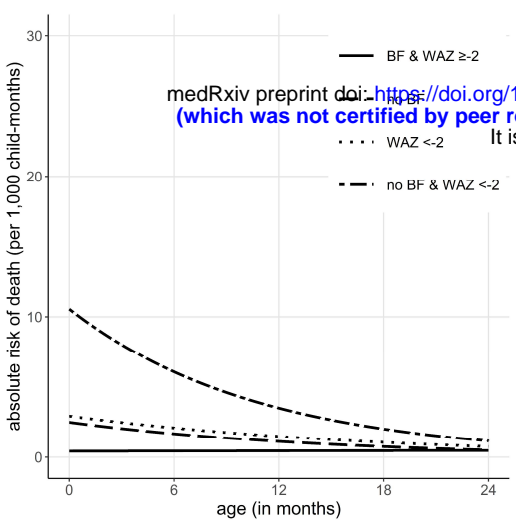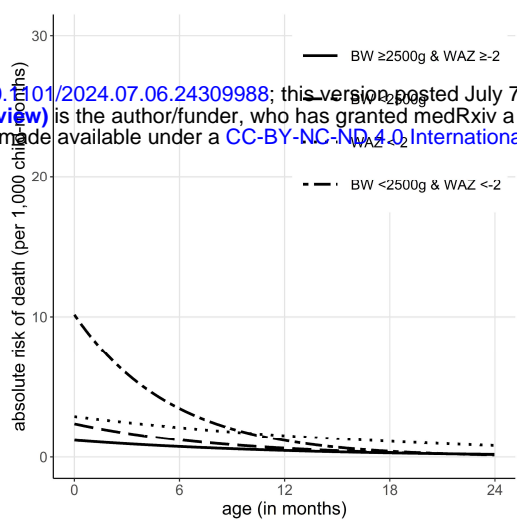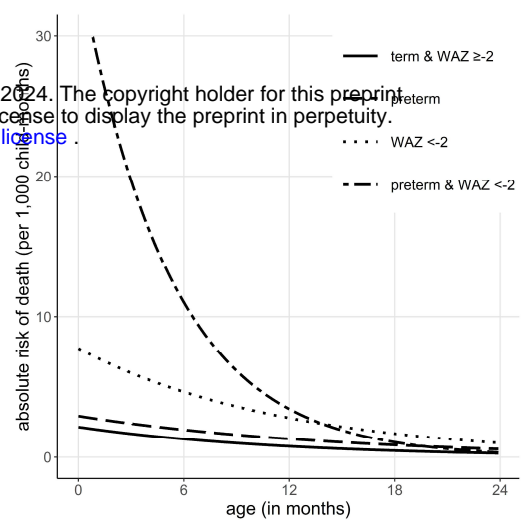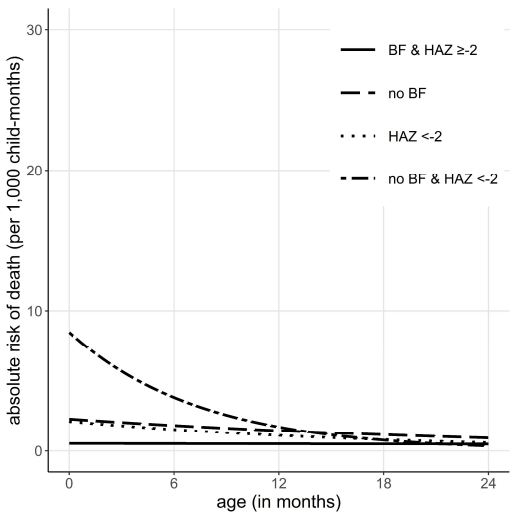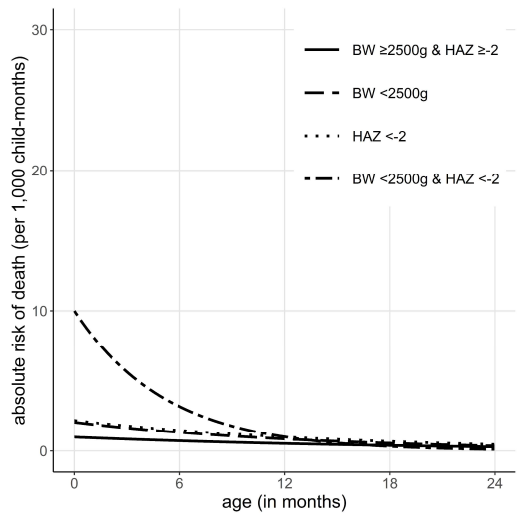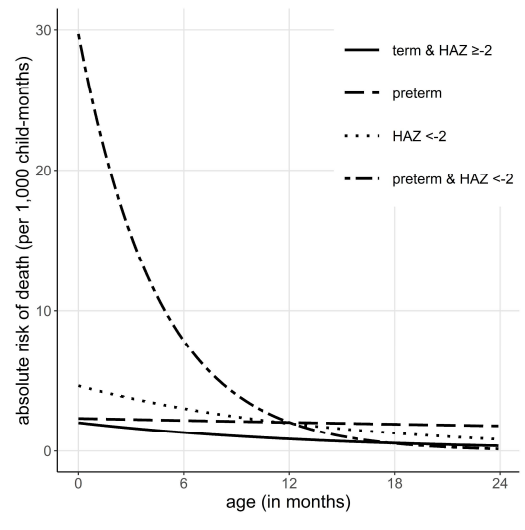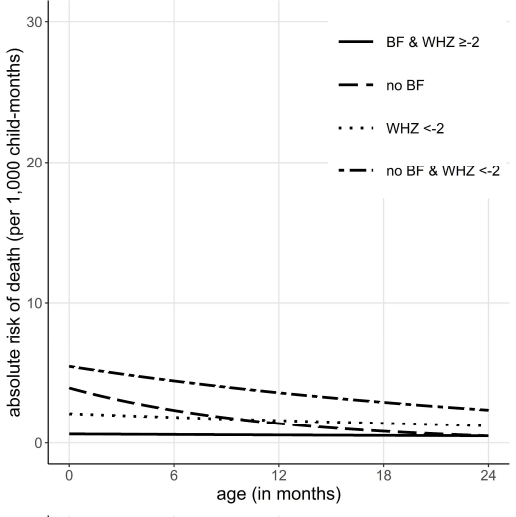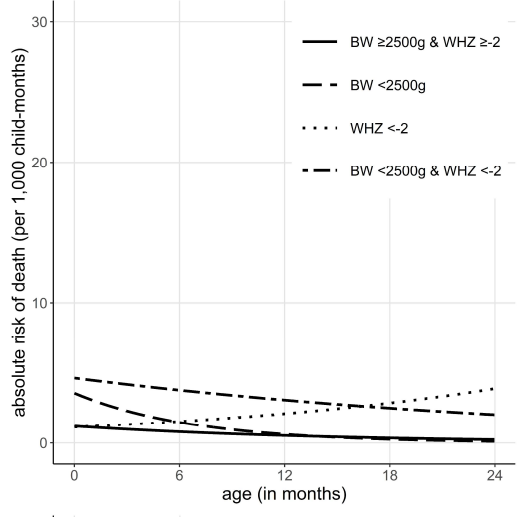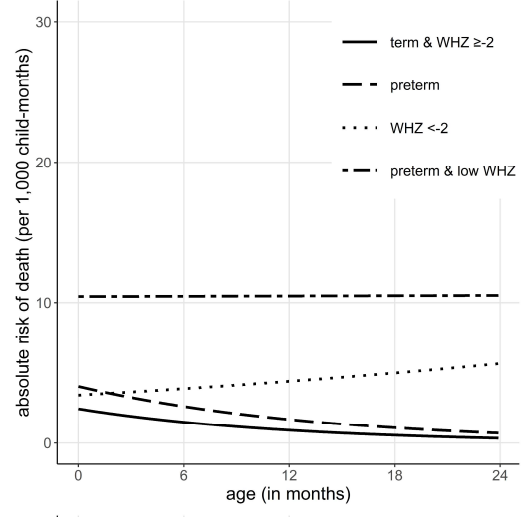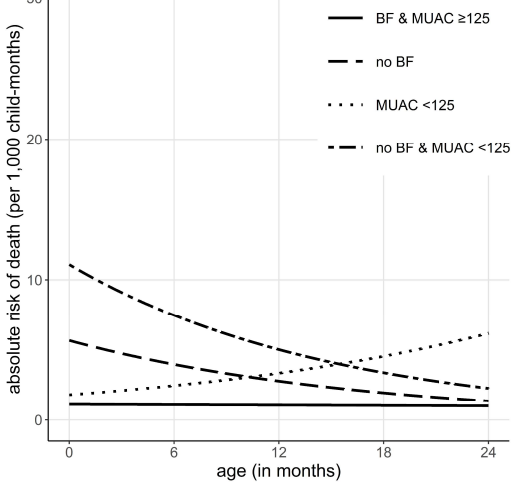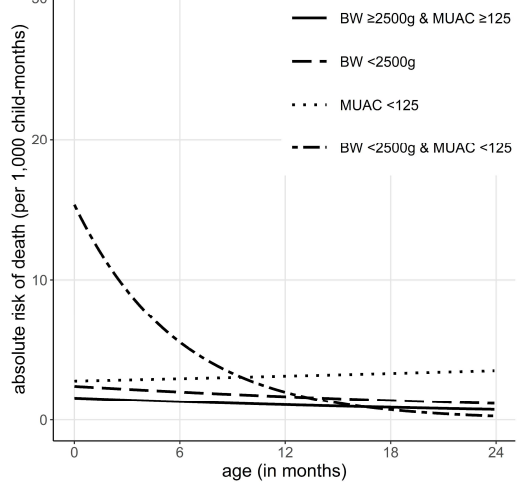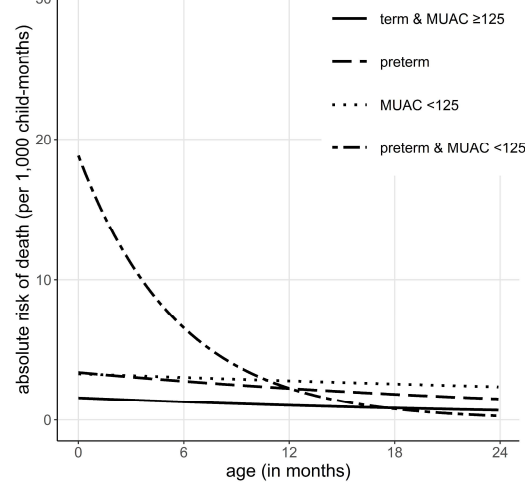

Source: https://medrxiv.org/content/10.1101/2024.07.06.24309988v1.full.pdf
